# Zebrafish differentially process colour across visual space to match natural scenes

Maxime JY Zimmermann\*<sup>1</sup>, Noora E Nevala\*<sup>1</sup>, Takeshi Yoshimatsu\*<sup>1</sup>,  
Daniel Osorio<sup>1</sup>, Dan-Eric Nilsson<sup>2</sup>, Philipp Berens<sup>3,4,5</sup> and Tom Baden<sup>1,3</sup>\$

1: School of Life Sciences, University of Sussex, UK

2: Lund Vision Group, University of Lund, Sweden

3: Institute of Ophthalmic Research, University of Tübingen, Germany

4: Bernstein Centre for Computational Neuroscience, University of Tübingen, Germany

5: Centre for Integrative Neuroscience, University of Tübingen, Germany

\*equal contribution

\$Correspondence at [t.baden@sussex.ac.uk](mailto:t.baden@sussex.ac.uk)

7 colour figures (main) and 4 colour figures (supplement), 3 Supplementary Data sheets

Words: 5737 (Main incl. abstract), 2380 (Methods), 1596 (Legends), 1281 (Supplement)

**Abbreviations used.** AC: Amacrine Cell; BC: Bipolar Cell; BIC: Bayesian Information Criterion; ChAT: Choline acetyltransferase; *dpf*: days postfertilisation; GCL: Ganglion Cell Layer; GFP: Green Fluorescent Protein; HC: Horizontal Cell; IPL: Inner Plexiform Layer; INL: Inner Nuclear Layer; LED: Light Emitting Diode; LWS: Long Wavelength Sensitive; MWS: Middle Wavelength Sensitive; PCA: Principal Component Analysis; PKC $\alpha$ : Phosphokinase C alpha; PR: Photoreceptor; RGC: Retinal Ganglion Cell; RGBU: Red-Green-Blue-Ultraviolet; ROI: Region of Interest; OPL: Outer Plexiform Layer; SAC: Starburst Amacrine Cell; s.d.: Standard deviation; s.e.m.: Standard Error of the Mean; SWS: Short Wavelength Sensitive; SZ: Strike Zone; UV: Ultraviolet; UVS: UV Sensitive.

## 31 **Summary**

32 Animal eyes evolve to process behaviourally important visual information, but how retinas  
33 deal with statistical asymmetries in visual space remains poorly understood. Using  
34 hyperspectral imaging in the field, *in-vivo* 2-photon imaging of retinal neurons and anatomy,  
35 here we show that larval zebrafish use a highly anisotropic retina to asymmetrically survey  
36 their natural visual world. First, different neurons dominate different parts of the eye, and are  
37 linked to a systematic shift in inner retinal function: Above the animal, there is little colour in  
38 nature and retinal circuits are largely achromatic. Conversely, the lower visual field and  
39 horizon are colour-rich, and are predominately surveyed by chromatic and colour-opponent  
40 circuits that are spectrally matched to the dominant chromatic axes in nature. Second, above  
41 the frontal horizon, a high-gain ultraviolet-system piggy-backs onto retinal circuits, likely to  
42 support prey-capture. Our results demonstrate high functional diversity among single  
43 genetically and morphologically defined types of neurons.

44

45 **Main**

46 Sensory systems have evolved to serve animals' behavioural requirements. They are tuned  
47 to prioritise behaviourally important computations subject to constraints on the neural  
48 hardware and metabolic cost (Land & Nilson 2012; Cronin et al. 2014). In vision,  
49 specialisations are often made according to the statistics of specific regions in visual space.  
50 For example, mouse cones preferentially process dark contrasts above but not below the  
51 visual horizon, likely boosting the detection of aerial predators (Baden et al. 2013; Yilmaz &  
52 Meister 2013; Calderone & Jacobs 1995). However, beyond anisotropic receptor  
53 distributions, systematically linking the statistics of the visual world to the properties of visual  
54 systems has been difficult (Lewis & Zhaoping 2006; Ruderman et al. 1998; Webster &  
55 Mollon 1997; Buchsbaum & Gottschalk 1983; Simoncelli & Olshausen 2001). Making a link  
56 of this kind ideally requires an animal model that allows *in vivo* measurements of light-driven  
57 neuronal activity in any part of the eye. In addition, it is necessary to measure the visual  
58 characteristics of the animal's natural world (Dyakova & Nordström 2017), and focus on  
59 aspects that are behaviourally important yet sufficiently low-dimensional to be amenable to  
60 statistical evaluation. One model that meets these criteria is the colour vision system of the  
61 larval zebrafish.

62 Within three days of hatching, larval zebrafish become highly visual animals with  
63 tetrachromatic wide-angle vision (Wong & Dowling 2005; Mehta et al. 2013; Easter, Jr. &  
64 Nicola 1996) and well-studied visual behaviours (Preuss et al. 2014; Trivedi & Bollmann  
65 2013; Semmelhack et al. 2014; Temizer et al. 2015; Dunn et al. 2016; Bianco et al. 2011;  
66 Muto & Kawakami 2013; Avdesh et al. 2010; Mueller & Neuhauss 2014). Vision is  
67 metabolically costly for larval zebrafish: the two eyes make up nearly a quarter of the total  
68 body volume, with the neuronal retina taking up >75% of each eye. Indeed, about half of the  
69 larva's central neurons are located inside the eyes (Supplementary Discussion). Space  
70 limitations and energy demand create strong evolutionary pressure to make the best use of  
71 every visual neuron – potentially driving regional specialisations within the eye. Here, we

72 examine how larval zebrafish retinal circuits process chromatic information in the immediate  
73 context of their natural visual world and their behavioural demands. Throughout, we used  
74 zebrafish larvae at 7-8 days post fertilisation, *dpf* (for discussion on the choice of age see  
75 Supplementary Materials). We find that the eye is functionally and anatomically extremely  
76 anisotropic, and these anisotropies match an asymmetrical distribution of colour in the  
77 zebrafish natural habitat.

78

### 79 **Chromatic content in nature varies with visual elevation**

80 Zebrafish are surface dwelling freshwater fish of the Indian subcontinent (Arunachalam et al.  
81 2013; Parichy 2015; Spence et al. 2008). Larval and juvenile zebrafish live mostly in shallow,  
82 low current pockets on the sides of streams and rice paddies – probably to avoid predation  
83 by larger fish (Engeszer et al. 2007), to conserve energy and to facilitate visually guided prey  
84 capture of aquatic microorganisms such as paramecia (Semmelhack et al. 2014; Bianco et  
85 al. 2011; Preuss et al. 2014; Muto et al. 2017). To systematically record how the visual world  
86 varies with elevation in the zebrafish natural habitat we used two complementary  
87 approaches: (i) an action camera to take underwater 180° wide-angle, high spatial resolution  
88 photographs (Fig. 1-e) and (ii) a custom-built hyperspectral scanner (Baden et al. 2013;  
89 Nevala et al. 2017) to take 60° full-spectrum images at a lower spatial resolution, matched to  
90 that of the larval zebrafish (Fig. 1f-l). We surveyed n=31 scenes from six field sites in West  
91 Bengal, India (SFig. 1a,b, Supplementary Data).

92 The action camera data demonstrated that in these shallow (<50 cm) waters, both the  
93 substrate and the water surface are simultaneously viewed by the larvae's wide-angle eyes  
94 (Fig. 1a), and that the spectrum of light varies strongly with elevation. Directly ahead and to  
95 the sides zebrafish eyes align with a mid-wavelength- ("green") dominated underwater  
96 horizon which divides a long-wavelength- ("red") biased lower visual field and a short-  
97 wavelength- ("blue") biased upper visual field of the ground reflecting the underside of the



98 water surface (Fig. 1a, SFig. 1 b-d). Beyond  $\sim 42^\circ$  elevation, this reflection gives way to  
99 Snell's window (Jerlov 1976; Janssen 1981) – a short-wavelength-biased representation of  
100 the  $180^\circ$  world above the water surface compressed into a constant  $\sim 97^\circ$  of visual angle  
101 directly above the animal. To estimate which part of the scene contained most chromatic  
102 information, we used principal component analysis, using red, green and blue (RGB) pixel  
103 values from different elevations. As in terrestrial scenes (Lewis & Zhaoping 2006), PC1  
104 reliably captured the achromatic component where the R, G and B channels co-vary (Fig.  
105 1b). Across the entire image, this component always explained  $>90\%$  of the total variance.  
106 Next, PC2 and PC3 captured the main chromatic axes (red versus blue; green versus blue)  
107 in decreasing order of importance (Fig. 1c,d). Further analysis revealed that the horizon and  
108 lower visual field accounted for most chromatic structure, while Snell's window above the  
109 animal was effectively achromatic (Fig. 1e). For this, we horizontally divided each of  $n=31$   
110 images into  $5^\circ$  stripes and calculated the fraction of the total image variance explained by  
111 PC2 and PC3 as a function of elevation (Fig. 1e). As our camera was designed for human  
112 trichromacy, and can therefore only approximate the spectral content available to the  
113 zebrafish's tetrachromatic retina (Chinen et al. 2003; Endeman et al. 2013), we next  
114 computed the chromatic image statistics in hyperspectral images taken at the same sites as  
115 seen by the larval zebrafish.

116

### 117 **Spectral positioning of zebrafish cone-opsins under natural light**

118 To sample full-spectrum underwater images in the zebrafish natural world, we custom built a  
119 hyperspectral scanner (Baden et al. 2013) comprising a spectrometer and two mirrors  
120 mounted on Arduino-controlled servo-motors (Fig. 1f) (Nevala et al. 2017). The system  
121 collected  $60^\circ$  full spectrum (200-1000 nm) images centred on the underwater horizon.  
122 Individual readings were regularly spaced at  $\sim 1.6^\circ$  to approximate the behavioural resolution  
123 limit of larval zebrafish (Haug et al. 2010). A total of 31 scans of 1,000 "pixels" each were

124 taken at the same scenes previously photographed with our action camera (Supplementary  
125 Data). To estimate what spectral content is available in nature for zebrafish vision, we  
126 multiplied the mean of all 31,000 spectra with the animal's cone absorption spectra.  
127 Zebrafish larvae express mainly four opsins in their four cone types: LWS (548nm), MWS  
128 (467 nm), SWS (411 nm) and UVS (365 nm) (Chinen et al. 2003) (for discussion see  
129 Supplementary Materials). For simplicity, we will refer to these as the “red” (R), “green” (G),  
130 “blue” (B) and “ultraviolet” (U) channels, respectively. As expected (Morris et al. 1995; Chiao  
131 et al. 2000), short-wavelengths from the sky illumination were attenuated in the water,  
132 resulting in a red-shift of the available light (Fig. 1g). The peak of the mean underwater-  
133 spectrum aligned with the absorbance peak of the zebrafish R-opsin (Fig. 1h), suggesting  
134 that R-cones are strongly driven in the zebrafish's natural habitat, and are thus well suited to  
135 encode features that require high signal-to-noise representation, such as movement  
136 (Schaerer & Neumeier 1996). In contrast, U-cones lay at the extreme short-wavelength end  
137 of available light under water. In this regime, the signal power is ~7% compared to the red  
138 channel. Investing neural resources despite the low signal power suggests that zebrafish  
139 gain important benefits from using this channel. For example, it could aid detecting UV-rich  
140 prey (Novales Flamarique 2012; Flamarique 2016) against the water's underside internal  
141 reflection (Janssen 1981), boost achromatic contrasts against the underwater horizon (Losey  
142 et al. 1999; Nava et al. 2011) and more generally to support detection of chromatic contrast.  
143 Finally, B- (16%) and G-cones (45%) received intermediate number of photons, and are  
144 likely used for both achromatic and chromatic computations alongside the other cones.

145

#### 146 **Short-vs-long wavelength computations carry most chromatic information**

147 We next asked which chromatic contrasts in RGBU opsin space predominate in the natural  
148 environment of the zebrafish larvae. For this, we multiplied the spectrum of each “pixel” with  
149 the spectral sensitivity function of each opsin to yield four monochromatic opsin activation  
150 images from each scan (Fig. 1i,j, SFig. 1f, cf. Fig. 1a), one for each opsin channel. As

151 predicted from the available light, the R-opsin image showed the most spatial structure,  
152 followed by G and B. In contrast, the U-opsin image had a “foggy” appearance, probably due  
153 to UV-light scattering on dissolved organic matter. Such UV-background light can be  
154 exploited by animals to detect the UV-dark silhouettes of otherwise difficult to spot objects  
155 (Cronin & Bok 2016; Losey et al. 1999).

156 Next, to separate achromatic and chromatic content across these four opsin images, we  
157 computed PCA across now 4-dimensional RGBU opsin space (like above). This again  
158 reliably extracted achromatic luminance information into PC1 and then three chromatic  
159 dimensions (PC2-4) (Fig. 1k, SFig. 1e). The mean opsin contrasts obtained by PCA across  
160 all n=31 scans were (i) RG / BU (“long vs. short wavelength opponency”), (ii) RU / GB and  
161 (iii) RB / GU (complex opponencies). We again cut the images into 5° horizontal stripes and  
162 found that the sum of variance explained by the three chromatic dimensions peaked at and  
163 below the underwater horizon (Fig. 1l, cf. Fig. 1e).

164 The efficient coding hypothesis (Attneave 1954; Barlow 1961; Simoncelli & Olshausen 2001)  
165 predicts that the obtained opsin contrasts should also be encoded by retinal neurons, as is  
166 the case for human trichromacy (Buchsbaum & Gottschalk 1983; Lewis & Zhaoping 2006).  
167 Moreover, these circuits should be biased to retinal regions that survey the horizon and  
168 lower visual field, where these chromatic contrasts predominate (Fig. 1m). In addition,  
169 species specific visual demands that cannot emerge from the statistics of static scenes, such  
170 as the need for prey capture and to avoid predators, may drive the evolution of additional,  
171 dedicated circuits. For example, zebrafish larvae feed on “translucent” unicellular paramecia  
172 that scatter light in a UV-biased manner (Spence et al. 2007; Novales Flamarique 2012;  
173 Flamarique 2016). For capture, larvae approach their prey from slightly below and converge  
174 the eyes to bring their image into binocular space in front of and just above the horizon  
175 (Bianco et al. 2011; Patterson et al. 2013), but outside Snell’s window (J Semmelhack,  
176 personal communication). In this part of visual space, the paramecium is illuminated by its  
177 own Snell’s window and thus - from point of view of the larval zebrafish - broadcasts its

178 position as a UV-bright spot against the underside of the water (Fig. 1n) (Janssen 1981). For  
179 surveying this part of visual space (here dubbed “strike zone”, SZ), the larval retina should  
180 invest in UV-driven prey capture circuits. Finally, detecting UV-dark silhouettes against a UV-  
181 bright background should work across the entire upper visual field including Snell’s window.

182 Our natural image data and known behavioural demands of larval zebrafish lead to three  
183 predictions for how these animals’ retinal circuits should be organised for efficient coding:

184 1) Above the animal, light is short-wavelength biased and there is little colour  
185 information, but the visual input can be used to spot silhouettes – accordingly, circuits  
186 should be achromatic or short-wavelength biased.

187 2) In the strike zone, the behavioural requirement for prey capture should drive an  
188 increased predominance of UV-On circuits.

189 3) Along the horizon, and below the animal, the retina should invest in chromatic  
190 circuits, with an emphasis on short- versus long-wavelength computations.

191 We next set out to test these predictions experimentally. We first assess the distributions of  
192 retinal neurons across the eye, and subsequently used *in-vivo* functional imaging to study  
193 the chromatic organisation of the inner retina.

194

### 195 **Anisotropic photoreceptor distributions match the distribution of natural light**

196 To study the distribution of the zebrafish larvae’s four cone- and one rod-photoreceptor types  
197 across the retinal surface, we fluorescently labelled individual photoreceptor populations. For  
198 R-, B- and U-cones we expressed fluorescent proteins under cone-type specific promoters  
199 *thrb*, *sws2* and *sws1*, respectively. No line exclusively labelling G-cones was available.  
200 Instead, we calculated their distribution by subtracting genetically defined R-cones from  
201 retinæ where both R- and G-cones were labelled using immunohistochemistry (zpr-1  
202 antibody (Larison & Bremiller 1990)). Finally, rod-photoreceptors (rods) were surveyed by  
203 expressing mCherry under rod specific promoter *xops* (Fadool 2003). We projected each 3D

204 retina as imaged under a confocal microscope into a local-distance-preserving 2D plane,  
205 counted photoreceptors and projected their positions back onto the original semi-sphere to  
206 generate density maps of each photoreceptor type across the 3D eye (Fig. 2a, Methods).

207 Unlike in adults, who feature a crystalline photoreceptor mosaic (Engström 1960), in larvae  
208 all photoreceptor distributions were anisotropic (Fig. 2b-d). The sum of all cones, which  
209 made up ~92% of all photoreceptors, peaked at the horizon (Fig. 2c,d), in line with this part  
210 of visual space comprising most chromatic information in nature (Fig. 1e,i). This bias was  
211 mainly driven by R-, G-, and B- cones. In contrast, UV-cones peaked ~30° above the forward  
212 facing horizon to form a UV-specialised area centralis (Schmitt & Dowling 1999), likely to  
213 support visual prey capture (Fig. 1n). Next, the lower visual field was dominated by R-cones,  
214 yet closely followed by approximately matched densities all other cones. Like the horizon,  
215 this part of visual space could therefore be used for colour vision (Fig. 1m), but with an  
216 additional long-wavelength bias as observed in nature (SFig. 1d). In contrast, the upper  
217 visual field comprised fewest cones of any type, but instead had an increased number of  
218 rods. Unlike cones, rods near exclusively looked straight up through the effectively  
219 achromatic but bright Snell's window, or straight down, perhaps to support the detection of  
220 optic flow on the ground even in dim light and/or allow telling the distance to the ground for  
221 maximal camouflage for predation from above. Accordingly, already at the level of  
222 photoreceptor distributions, the retina of larval zebrafish exhibits a series of anisotropies that  
223 align well with the major spectral trends in their visual world and their behavioural demands.  
224 How are these anisotropies reflected in the inner retina?

225

## 226 **An anisotropic inner retina**

227 To survey inner retinal structure, we immunolabelled the intact eyes of 7-8 *dpf* *Tg(-*  
228 *1.8ctbp2:SyGCaMP6)* larvae against GFP (green, all bipolar cell (BC) terminals (Johnston et  
229 al. 2014), ChAT (blue, starburst amacrine cells, SACs (Famiglietti 1983; Nevin et al. 2008))

230 and PKC $\alpha$  (magenta, “On” BCs (Nevin et al. 2008)) and imaged them across the sagittal  
231 plane aligned with the back-surface of the lens in the 3D eye (Methods). In larval zebrafish,  
232 the full monocular field of view is  $\sim 163^\circ$ , and at rest eyes are rotated forwards by  $\sim 18.5^\circ$   
233 ( $\sim 35.5^\circ$  during prey-capture) (Bianco et al. 2011; Patterson et al. 2013). The surveyed  
234 sagittal plane samples the visual world in a cone of  $\sim 130^\circ$  (Fig. 2e, SFig. 2), such that its  
235 temporal extreme projects in front of the fish while the nasal extreme projects outwards and  
236 backwards along the horizon. Dorsal and ventral positions survey the visual world at  $\sim 65^\circ$   
237 elevation below and above the animal, respectively. For simplicity, all visual field coordinates  
238 are given in egocentric space from the point of view of the fish: up (ventral), “strike zone”  
239 (SZ, temporo-ventral), down (dorsal) and outward horizon (nasal).

240 Our data on inner retinal structure consolidated and extended all large-scale anisotropies  
241 set-up by the photoreceptors (Fig. 2f-l). Like cone-densities (Fig. 2c,d), also inner retinal  
242 thickness varied nearly two-fold with position, with the thickest inner plexiform layer (IPL)  
243 segments aligning with the horizons (Fig. 2f,k). Alongside, the number, distribution, shapes  
244 and sizes of synaptic terminals varied with eye position. For example, while PKC $\alpha$  labelling  
245 highlighted three strata in the strike zone (one between and two below the ChAT bands, Fig.  
246 2h<sub>2</sub>), circuits surveying the world above the animal appeared to have only the two lower  
247 strata (Fig. 2i<sub>2</sub>). Here, the lowest band featured particularly large BC terminals that are  
248 characteristic for teleost “mixed” BCs that process inputs from rod-photoreceptors (Stell  
249 1967) – in agreement with the anisotropic distribution of rods (Fig. 2c). In addition, there  
250 were PKC $\alpha$  negative terminals at the IPL bottom that were restricted to the strike zone (Fig.  
251 2h, l). SAC processes also varied with position. For example, the neat bilayer of ChAT  
252 immunoreactivity in the strike zone and for looking outward (Figs. 2h<sub>2</sub>, j<sub>2</sub>) disappeared into a  
253 “haze” in circuits looking down (Fig. 2i<sub>2</sub>, Fig. 2l). Clearly, the larval zebrafish retina features a  
254 broad range of anatomical specialisations across the visual field. How are these anatomical  
255 specialisations reflected in function? To address this question, we next turned to calcium  
256 imaging of BC terminals across the eye.

257

## 258 **The inner retina is divided into anisotropic chromatic and achromatic layers**

259 We used 2-photon *in vivo* imaging of light-driven activity in retinal BCs expressing the  
260 calcium biosensor GCaMP6f under the *ctbp2* (*ribeyeA*) promoter fused to the synaptic  
261 protein Synaptophysin (Dreosti et al. 2009; Rosa et al. 2016). We focussed on BCs (Euler et  
262 al. 2014) as (i) they directly and differentially collect inputs from all photoreceptors to form  
263 the basis of colour vision (Li et al. 2012; Behrens, Schubert, Haverkamp, Euler & Berens  
264 2016), (ii) they are the only neuron class that contacts all other neurons in the retina and (iii)  
265 they directly drive retinal ganglion cells, the eye's connection to the brain. Individual pre-  
266 synaptic terminals of BCs can be resolved while imaging the entire depth of the inner retina  
267 (Dreosti et al. 2009) (Fig. 3a).

268 To estimate each BC terminal's chromatic sensitivity, we used a tetrachromatic "noise"  
269 stimulus (Fig. 3b,c). Specifically, each of four LEDs that were spectrally matched to the  
270 absorption peaks of the four cone-opsins (SFig. 3a) were presented to the live larvae  
271 through the objective and flickered in a known random binary sequence at 12.8 Hz (Fig. 3b).  
272 Using reverse correlation (Chichilnisky 2001), we then recovered four temporal response  
273 kernels for each BC terminal (Franke et al. 2017), one for each LED and thus effective cone-  
274 type input (Fig. 3c). This revealed different chromatic sensitivities in different BC terminals.  
275 For example, some terminals displayed near-equal sensitivity to all four LEDs, indicating a  
276 wavelength-invariant response preference (achromatic terminals, Fig. 3a-c, ROI 1). Other  
277 terminals had kernels with opposite polarity across LEDs (colour opponent terminals, Fig.  
278 3a-c, ROI 2). In an example scan from the "outward horizon" for all opsin channels, the  
279 majority of Off- and On-responses occurred in the upper and lower part of the IPL,  
280 respectively (Fig. 3d,e), in line with mammalian inner retinal circuits (Masland 2001; Wässle  
281 2004; Euler et al. 2014; Franke et al. 2017). However, the transition depth between On- and  
282 Off-bands differed between cone-channels, with the R-channel transitioning closer to the  
283 inner nuclear layer (INL) than the other three. As a result, two achromatic bands at the top



284 (R<sub>GBU</sub><sub>Off</sub>, black) and in the centre (R<sub>GBU</sub><sub>On</sub>, white) of the IPL were separated by a layer of  
285 R<sub>On</sub>/G<sub>BU</sub><sub>Off</sub> colour opponent responses (orange) (Fig. 3e). Additional R(G)<sub>Off</sub>/B<sub>U</sub><sub>On</sub> opponent  
286 responses occurred at the lower edge of the IPL. The remaining response types were  
287 classified as “other” and were mostly confined to the On-channel in the lower part of the IPL  
288 (grey). Accordingly, in this part of the eye the inner retina was organised into distinct  
289 functional layers. Moreover, as predicted from natural light, all colour opponent terminals  
290 computed short- versus long-wavelength chromatic contrasts. However, this functional  
291 layering was not consistently observed in other parts of the retina. In an example scan taken  
292 from the strike zone, nearly all terminals exhibited strong U(B)-On responses that reached  
293 far into the upper sublamina, while responses to R and G stimulation all but disappeared  
294 (Fig. 3f,g) – in striking agreement with the predicted need for dedicated UV-On prey-capture  
295 circuits in this part of the eye.

296

297 Together, these two examples demonstrate that the larval zebrafish IPL is functionally highly  
298 anisotropic. To systematically assess how BC responses are distributed across the eye, and  
299 which specific chromatic and colour opponent computations predominate, we recorded from  
300 a total of n=6,568 synaptic terminals across the sagittal plane (n = 115 scans, 12 fish at 7-8  
301 *dpf*), out of which n=4,099 (62%) that passed a quality criterion (SFig. 3b,c, Methods) were  
302 used for further analysis. All recordings were taken in the same sagittal plane used for  
303 anatomy (cf. Fig. 2f). This dataset showed that the zebrafish larval retina is functionally  
304 highly anisotropic (Fig. 3h-k, cf. SFig. 3d). For example, independent of wavelength, On- and  
305 Off-responses were systematically biased to the upper- and lower- visual fields, respectively.  
306 Here, a disproportionate number of U<sub>On</sub> responses surveyed the strike zone (Fig. 3k). What  
307 is the functional distribution of BCs across the larval zebrafish eye, and what do they  
308 encode?

309



310 **Large-scale functional anisotropies of the inner retina match natural spectral**  
311 **statistics**

312 To assign BCs to functional clusters, we used a Mixture of Gaussian model to sort terminals  
313 independent of eye position based on their full temporo-chromatic response kernels (Fig. 4,  
314 Methods). BC terminals fell into  $n=26$  clusters, which were further grouped into four major  
315 response groups:  $n=5$  achromatic clusters ( $C_{1-5}$ , Fig. 4a),  $n=9$  UV(B)-monochromatic clusters  
316 ( $C_{6-14}$ , Fig. 4b),  $n=6$  chromatic clusters ( $C_{15-20}$ , Fig. 4c),  $n=5$  colour opponent clusters ( $C_{21-25}$ ,  
317 Fig. 4d) and  $n=1$  discard cluster ( $C_x$ , Fig. 4e, Methods). These groups were defined based  
318 on the relative amplitudes and polarities of each cluster mean's four chromatic kernels  
319 (Methods): Equal polarity equal gain (achromatic), equal polarity different gain (chromatic  
320 and UV(B)-monochromatic) or different polarity (colour opponent). In addition, we  
321 distinguished UV(B)-monochromatic clusters from other chromatic clusters in view of the  
322 hypothesised behavioural relevance of such a channel (Fig. 1n). Their abundance and  
323 extreme short-wavelength bias indicate the existence of a dedicated UV-system that is not  
324 integrated with other chromatic retinal circuits.

325 For each cluster, we computed the anatomical distribution across the eye and IPL depth  
326 (right insets). This revealed that no functional BC cluster, nor any major functional group  
327 (Fig. 4f-h), was uniformly distributed across the entire field of view. Instead, most clusters  
328 predominated in either the upper or lower visual field, with some clusters in addition  
329 exhibiting a secondary bias to predominately looking forwards or outwards. In agreement  
330 with our predictions, all UV(B)-monochromatic clusters were strongly biased to the upper  
331 and forward-facing visual field (Fig. 4b,f), while all colour opponent clusters were skewed  
332 towards the lower and outwards facing visual field (Fig. 4d,g). In fact, there were effectively  
333 no colour opponent terminals that survey the world directly upwards through the nearly  
334 achromatic Snell's window. Together, all circuits potentially dealing with colour (all chromatic  
335 and opponent clusters) surveyed the lower and outward horizontal visual field, while all  
336 circuits likely to deal with achromatic computations (all UV(B)-monochromatic and

337 achromatic clusters) were skewed towards the upper and frontal visual field (Fig. 4h).  
338 Moreover, four out of five colour opponent clusters computed short- versus long-wavelength  
339 chromatic antagonisms (reminiscent of PC2 from natural scenes), while the remaining single  
340 cluster (C<sub>23</sub>) compared G- to all other channels (reminiscent of a mix of PCs 3 and 4) (Fig.  
341 4d, cf. Fig. 1k). This set of functional anisotropies of the larval zebrafish inner retinal circuitry  
342 is in strong agreement with the distribution of behaviourally meaningful chromatic content in  
343 nature (Fig. 1m,n).

344

### 345 **The functional layering of the larval zebrafish inner retina**

346 Next, we assessed how different response types were distributed across the layers of the  
347 IPL (Fig. 5). Unlike in mammals (Euler et al. 2014), BCs in most non-mammalian  
348 vertebrates, including zebrafish, can have mono-, bi- and tri-stratified morphologies (Li et al.  
349 2012; Connaughton & Nelson 2000). In agreement, terminals falling into individual clusters  
350 were mostly distributed across 1-3 major IPL bands (Fig. 4a-e, right insets), indicating that  
351 each could principally be linked to a single or small number of BC types. To establish the  
352 major trends in functional organisation of the IPL, we subdivided each of the four major  
353 response groups (achromatic, UV-monochromatic, chromatic, colour opponent) into their  
354 “On” and “Off”-dominated response-types and assessed the distribution of each of the  
355 resultant eight groups across the depth of the IPL for different positions in the eye (Fig. 5a).

356 Most response groups (Fig. 5a, rows 2-9) were largely restricted to subsets of the larval  
357 zebrafish’s six anatomical IPL layers (row 1, black). However, some functions were  
358 distributed more broadly than others. For example, most achromatic On-terminals (row 3,  
359 grey) occurred just beneath the outer ChAT band (GCL side), and could be found in any  
360 eye-position – albeit at varying densities. In contrast, UV(B)-monochromatic On-terminals  
361 occurred across the entire outer part of the IPL (layers 3-6) but remained near exclusively  
362 restricted to the upper visual field (row 5, lilac). Other “functions” were tightly restricted in

363 both visual field and IPL depth. For example, colour opponent Off-dominated terminals were  
364 near exclusively found in layers 1 and 3, and only in the lower visual field (row 8, brown).  
365 Next, we again combined “On” and “Off” versions of each response group for clarity and  
366 superimposed the resulting four histograms of the four response groups for different eye  
367 positions (Fig. 5b,c). Looking up, each IPL layer contained a substantial fraction of UV(B)-  
368 monochromatic terminals; only in layers 2 and 5 there were more chromatic and achromatic  
369 terminals, respectively (Fig. 5b<sub>1</sub>). In the strike zone, this UV(B)-dominance further intensified,  
370 and shifted towards the Off-bands in the lower IPL – in line with UV-On circuits aiding the  
371 detection of paramecia (Fig. 5b<sub>2</sub>, cf. Fig. 1n). In contrast, there were effectively no UV-  
372 monochromatic terminals looking down, and the IPL appeared more neatly divided into  
373 layers differentially encoding colour opponent, chromatic and achromatic information (Fig.  
374 5b<sub>3</sub>). Finally, IPL circuits surveying the outward horizon had approximately balanced  
375 numbers of terminals from each functional group, and a similarly neat functional organisation  
376 with IPL depth as observed for the lower visual field (Fig. 5b<sub>4</sub>).

377 The complexity of functional layers differed markedly, in particular between the strike zone  
378 and upper visual field (Fig. 5b<sub>1,2</sub>), compared to the lower visual field and outward horizon  
379 (Fig. 5b<sub>3,4</sub>). In the latter, the total number of peaks often used as a tell-tale for individual IPL  
380 strata far exceeded the 6 traditionally used anatomical layers of the larval zebrafish IPL. This  
381 suggests that this part of the eye harbours more diverse BC circuits than what is required in  
382 much more “simple”-appearing circuits surveying the upper visual field.

383 A neat division of function into specific layers of the IPL for surveying the ground and  
384 outward horizon, though novel in its chromatic scope and complexity, is consistent with  
385 current knowledge on the functional organisation of the vertebrate inner retina (Euler et al.  
386 2014; Masland 2001; Wässle 2004; Franke et al. 2017). However, the overrepresentation of  
387 the UV(B)-channel in the upper and frontal visual fields, despite the presence of all other  
388 cone types, is striking. Here, most visual functions appear to draw near exclusively on On-  
389 and Off-UV(B)-monochromatic channels at the expense of both colour vision and the Off

390 achromatic channel. How does the eye build this rich functional division across visual  
391 space?

392

### 393 **Building a functionally anisotropic retina**

394 Across all vertebrate retinas studied to date there are distinct types of BCs, each with a  
395 unique anatomy, synaptic connections and functional properties (reviewed in (Euler et al.  
396 2014)). Both larval and adult zebrafish have ~20 morphologically distinct BC types, with a  
397 broad diversity of chromatic connections to cones in the outer retina (Li et al. 2012;  
398 Connaughton & Nelson 2000; Vitorino et al. 2009), many more than the dichromatic mouse  
399 (Behrens, Schubert, Haverkamp, Euler, Haverkamp, et al. 2016; Helmstaedter et al. 2013;  
400 Kim et al. 2014; Greene et al. 2016; Wässle et al. 2009). Two non-mutually exclusive design  
401 strategies may underlie the observed set of functional anisotropies; First, different types of  
402 BCs with different functions might specifically exist only in certain parts of the retina (Zhang  
403 et al. 2012; Bleckert et al. 2014). This hypothesis is, for example, supported by the absence  
404 of the characteristic large terminals of On-type mixed BCs outside the ventral- and dorsal-  
405 most retina (Fig. 2h,j), where rods are located (Fig. 2b,c). Second, the same types of BCs  
406 may exist across the entire retina, but shifting function with position (Baden et al. 2013;  
407 Joesch & Meister 2016; Chang et al. 2013; Sabbah et al. 2017).

408 We set out to test these two possibilities experimentally. For this, we used the xfz43 marker  
409 line, which labels at least three morphologically well-characterised types of BCs with  
410 different, known anatomical connections in the outer retina (D'Orazi et al. 2016). One Off-  
411 and one On-stratifying xfz43-positive BC type each preferentially contacts R- and G-cones  
412 across their large dendritic fields. Both are thus predicted to exhibit a RG-biased physiology.  
413 A third, smaller On-stratifying xfz43 type indiscriminately samples from all cones, and is  
414 therefore expected to encode On-achromatic features.

415 To selectively record from these cells' synaptic terminals, we crossed our *Tg(-*  
416 *1.8ctbp2:SyGCaMP6)* line to *Tg(xfz43:Gal4;UAS:ntr-mCherry)* animals (Fig. 6a,b). As  
417 before, this allowed recording from all BC terminals, but in addition labelled *xfz43*-cells are  
418 simultaneously recorded in the red fluorescence channel. This dataset (64 scans, 5 fish)  
419 represents a subset of the complete BC-survey presented previously (Figs. 3-5) and  
420 consisted of  $n=620$  *xfz43*-positive terminals, of which the 392 (63%) that passed our quality  
421 criterion (Methods) fell into 2 main IPL bands (Fig. 6c, red).

422 Next, we functionally assessed *xfz43* Off- and On-stratifying terminals separately. In  
423 agreement with their stratification, Off- and On-stratifying terminals fell into functional Off-  
424 and On-clusters, respectively (Fig. 6d,e). However, the presumed single *xfz43* Off-type  
425 (D'Orazi et al. 2016) fell into 6+ functional clusters that spanned all four major functional  
426 groups (Fig. 6d). Similarly, the presumed two On-type *xfz43* cells were sorted into 6+  
427 clusters that spanned 3 major functional groups (Fig. 6e). In fact, individual examples clearly  
428 demonstrated this functional diversity within a genetic type, irrespective of any clustering (not  
429 shown). This extreme functional diversity of all three presumed "clean", genetically defined  
430 BC types strongly suggests that - in the larval zebrafish eye - genetics alone do not predict a  
431 BC's physiology. Instead, a cell's functional identity appears to fundamentally depend on its  
432 surrounding neuronal network in different parts of the eye.

433 However, the allocation of *xfz43*-cells to functional clusters was far from random. For  
434 example, *xfz43* Off-terminal allocated clusters  $C_1$ ,  $C_{15}$  and  $C_{17}$  all exhibited at least a small  
435 RG-bias, consistent with these cells' known connectivity in the outer retina (D'Orazi et al.  
436 2016). Similarly, cluster  $C_{18}$ , which captured most chromatic *xfz43* On-terminals, had an RG-  
437 biased physiology, while the largely achromatic cluster  $C_2$  might reflect the cone-unselective  
438 *xfz43* cells. In each case, this mainly leaves several UV(B)-dominated response clusters that  
439 are not explained by these cells' cone-selectivity ( $C_{6-8,12,13}$ ).

440 Are these UV-clusters generated by UV-cone inputs with unusually high gain? For example,  
441 the small On-type *xfz43* cell indiscriminately integrates the outputs of fewer than 10 cones

442 (D’Orazi et al. 2016). Here, a hypothetical high-gain UV-input from only two or three cones  
443 could bias a cell towards a UV-dominated response. While this hypothesis clearly needs  
444 further exploration, already here several lines of evidence point at this as one mechanism of  
445 functional diversification across the larval zebrafish IPL. First, under natural light, UV-cones  
446 receive ~15 times fewer photons than red cones (Fig. 1h), prompting the need for a high-  
447 gain amplification system for short-wavelength visual processing. In agreement, in mice the  
448 gain of UV-cones appears to be higher than that of M-cones (Breuninger et al. 2011; Baden  
449 et al. 2013). Second, UV-cones numerically dominate the frontal- and upper visual field (Fig.  
450 2b-d). Third, UV-responses overall dominate the IPL in this part of the eye (Figs. 3k, 4b,f, 5),  
451 with their kernel amplitudes often exceeding those of any other opsin channels more than  
452 10-fold, despite the presence of all other cone types. Taken together, it therefore seems  
453 likely that at least to some extent larval zebrafish BC types with specific function exist in only  
454 parts of the eye, but that in addition more large-scale outer- and/or inner-retinal circuits can  
455 “override” this genetically defined functional organisation.

456

## 457 **Conclusion and outlook**

458 We have shown that inner retinal circuits of larval zebrafish are exquisitely matched to their  
459 natural visual environment on several levels. First, chromatic circuits are systematically  
460 integrated by a neatly layered inner retina, but only at the horizon and the lower visual field,  
461 which in nature contain the most chromatic information (Fig. 7a, cf. Figs. 1e,k, 4g,h, 5b).  
462 Here, the chromatic computations performed by these circuits match the differential  
463 predominance of different natural chromatic contrasts and behavioural demands (Fig. 4d,  
464 Fig. 1k). The upper and frontal visual fields are dominated by UV-driven circuits, a  
465 specialisation that begins with an anisotropic arrangement of UV-cones across the eye (Fig.  
466 2b-d) and is mirrored across the ventral inner retina, apparently at the expense of circuits  
467 serving colour vision and near inner retinal organisation (Fig. 7b, cf. Figs. 3k, 4f, 5). This UV-  
468 dominance is likely linked to the need to spot nearby UV-bright microorganisms (Novales

469 Flamarique 2012) as well as the ability to detect UV-dark objects on the backdrop of further  
470 UV-bright organic matter dissolved in the water (Losey et al. 1999; Nava et al. 2011;  
471 Goldsmith 1994). Achromatic cone-driven circuits are used across the entire visual field, but  
472 differentially use On- and Off dominant regions in the upper and lower visual field  
473 respectively, possibly to drive the dorsal righting response which helps fish maintain an  
474 upright posture by aligning their vertical body axis with the brightness gradient of light from  
475 the sky (Fig. 7c, cf. Fig. 3h-k). Finally, rod-driven circuits exclusively survey the visual field  
476 above and below the animal, likely to capitalise on the additional light caught through Snell's  
477 window and its ground reflections (Fig. 7d, cf. Fig. 2b, right). To what extent this set of  
478 striking regional specialisation of the larval zebrafish visual system is already established in  
479 the outer retina, how it is reflected in the adult (Pita et al. 2015), and how it is used in the  
480 retinal output and brain to ultimately drive behaviour will be important to address in future  
481 studies.

482 **METHODS**

483

484 No statistical methods were used to predetermine sample size.

485

486 **Field sites.** Six field sites were visited in West Bengal, India (Supplementary Fig. 1) in May  
487 2017, just before the monsoon season. The global positioning coordinates of each site were:  
488 Site 1 (lat. 26.531390, long. 88.669265), site 2 (lat. 26.528117, long. 88.641474), site 3 (lat.  
489 26.841041, long. 88.828882), site 4 (lat. 26.792305, long. 88.588003), site 5 (lat. 26.903202,  
490 long. 88.554333) and site 6 (lat. 26.533690, long. 88.648729). Zebrafish of all ages were  
491 found mostly in shallow pools of water adjacent to bigger streams (with exception of one  
492 deeper fish farm pond, site 6), in agreement with previous work (Arunachalam et al. 2013;  
493 Spence et al. 2008; Parichy 2015). The visited sites varied substantially with the type of  
494 habitat (different sized streams, stagnant fish farm pond), the amount of vegetation above  
495 and under water, the type of substrate and the current of the water (Supplementary Data).  
496 For analysis, all recorded data was combined without prior selection.

497

498 **Hyperspectral imaging.** To gather hyperspectral images, we used a custom made, water-  
499 proofed hyperspectral scanner (Nevala et al. 2017) built around a commercial spectrometer  
500 (Thorlabs CCS200/M, 200-1,000 nm). In short, two spectrally broad mirrors mounted on top  
501 of servo-motors were controlled by an Arduino Uno microcontroller to iteratively bring  
502 different positions in visual space into the active part of the spectrometer to build up a  
503 complete hyperspectral image (Baden et al. 2013). 1,000 Scan-points were spaced 1.6° and  
504 defined by a Fermat's spiral, followed by a custom path-shortening algorithm. Spectra were  
505 recorded using the spectrometer software OSA (Thorlabs). We used diving-weights to  
506 stabilise the scanner under water. In addition, the scanner-case was placed inside a hard-  
507 plastic box to maintain the upright position with a UV-transparent window pointing forward.



508 After placing the scanner to its <50 cm depth underwater position, we waited up to 5 minutes  
509 for any stirred-up debris to settle. All n=31 scans were taken during the day between 11am  
510 and 5pm; the weather conditions varied from slightly cloudy to clear sky, but remained  
511 constant for individual measurements. Time for one scan acquisition varied between 4 and 8  
512 minutes, depending on the set mirror-move times (200-500 ms) and integration times (80-  
513 200 ms) which were adjusted for each measurement to yield an approximately consistent  
514 signal-to-noise independent of absolute light intensity in each scene. Finally, in each case in  
515 addition to the scan a 180° still image was taken approximately at the scanner position with  
516 an action camera (Campark ACT80 3K 360°). Stills were mapped to the 2D plane by a  
517 standard angular fisheye projection to 720x720 pixels (0.25° per pixel).

518

519 **Animals and tissue preparation.** All procedures were performed in accordance with the UK  
520 Animals (Scientific Procedures) act 1986 and approved by the animal welfare committee of  
521 the University of Sussex. For all experiments, we used 7-8 days post fertilisation (*dpf*)  
522 zebrafish (*Danio rerio*) larvae of either sex. The following transgenic lines were used: *Tg(-*  
523 *1.8ctbp2:SyGCaMP6)*, *Tg(xfz43:Gal4;UAS:ntr-mCherry;-1.8ctbp2:SyGCaMP6)* (Zhao et al.  
524 2009), *Tg(opn1sw1:GFP)* (Takechi et al. 2003), *Tg(-3.2opn1sw2:mCherry)* (Salbreux et al.  
525 2012), *Tg(thrb:Tomato)* (Suzuki et al. 2013). In addition, a *Tg(xops:ntr-mCherry)* line was  
526 generated by injecting pXops-nfsB-mCherry plasmid into one-cell stage eggs and  
527 subsequently screening for the expression of mCherry among progenies of injected fish.  
528 pXops-nfsB-mCherry plasmid was constructed by replacing EGFP with nfsB-mCherry in  
529 XopsEGFP-N1 plasmid (Fadool 2003).

530 Owing to the exploratory nature of our study, we did not use randomisation and blinding.  
531 Animals were housed under a standard 14:10 day/night rhythm and fed 3 times a day.  
532 Animals were grown in 200 µM 1-phenyl-2-thiourea (Sigma) from 1 *dpf* to prevent  
533 melanogenesis (Karlsson et al. 2001). For 2-photon *in-vivo* imaging, zebrafish larvae were  
534 immobilised in 2% low melting point agarose (Fisher Scientific, Cat: BP1360-100), placed on

535 the side on a glass coverslip and submersed in fish water. Eye movements were further  
536 prevented by injection of  $\alpha$ -bungarotoxin (1 nl of 2 mg/ml; Tocris, Cat: 2133) into the ocular  
537 muscles behind the eye. For immunohistochemistry, larvae were culled by tricaine overdose  
538 (800 mg/l) at 7-8 *dpf*. Whole larvae were fixed in 4% paraformaldehyde for 25 min before  
539 being washed in phosphate-buffered saline (PBS).

540

541 **Two-photon  $\text{Ca}^{2+}$  imaging and light stimulation.** We used a MOM-type two-photon  
542 microscope (designed by W. Denk, MPI, Martinsried; purchased through Sutter  
543 Instruments/Science Products). Design and procedures were described previously (Euler et  
544 al. 2009). In brief, the system was equipped with a mode-locked Ti:Sapphire laser  
545 (Chameleon Vision-S, Coherent) tuned to 927 nm, two fluorescence detection channels for  
546 GCaMP6f (F48x573, AHF/Chroma) and mCherry (F39x628, AHF/Chroma), and a water  
547 immersion objective (W Plan-Apochromat 20x/1,0 DIC M27, Zeiss). For imaging mCherry,  
548 we used 960 nm excitation instead. For image acquisition, we used custom-written software  
549 (ScanM, by M. Mueller, MPI, Martinsried and T. Euler, CIN, Tuebingen) running under IGOR  
550 pro 6.3 for Windows (Wavemetrics), taking 64 x 32 pixel image sequences (15.625 frames  
551 per s) for activity scans or 512 x 512 pixel images for high-resolution morphology scans.

552 For light stimulation, we focussed a custom-built stimulator through the objective, fitted with  
553 band-pass-filtered light-emitting diodes (LEDs) ('red' 588 nm, B5B-434-TY, 13.5cd, 8°, 20  
554 mA; 'green' 477 nm, RLS-5B475-S; 3-4 cd, 15°, 20mA; 'blue' 415 nm, VL415-5-15; 10-16  
555 mW, 15°, 20 mA; 'ultraviolet, UV' 365 nm, LED365-06Z; 5.5 mW, 4°, 20 mA, Roithner,  
556 Germany). LEDs were filtered and combined using FF01-370/36, T450/pxr, ET420/40m,  
557 T400LP, ET480/40x, H560LPXR (AHF/Chroma). The final spectra approximated the peak  
558 spectral sensitivity of zebrafish R-, G-, B-, and UV-opsins, respectively, while avoiding the  
559 microscope's two detection bands (SFig. 3a). LEDs were synchronised with the scan retrace  
560 at 500 Hz. Stimulator intensity was calibrated (in photons per second per cone) such that  
561 each LED would stimulate its respective zebrafish cone-type with an equal number of

562 photons ( $\sim 10^5$  photons per cone per s). Assuming an effective absorption coefficient of  $\sim 0.1$ ,  
563 this translates to  $\sim 10^4$  photoisomerisations per cone per s ( $R^*$ ), a low photopic regime. We  
564 did not attempt to compensate for cross-activation of other cones, and relative LED-versus-  
565 opsin cross sections are listed in SFig. 3a. Owing to two-photon excitation of photopigments,  
566 an additional, steady illumination of  $\sim 10^4 R^*$  was present during the recordings (for detailed  
567 discussion, see (Baden et al. 2013; Euler et al. 2009)). For all experiments, the animal was  
568 kept at constant illumination for at least 5 seconds after the laser scanning started before  
569 light stimuli were presented. The only stimulus used throughout this work was a  
570 “tetrachromatic binary noise” stimulus. Here, each of the 4 LEDs was simultaneously but  
571 independently driven in a known binary sequence at 12.8 Hz for 258 seconds.

572

573 **Immunohistochemistry.** For the IPL structural analysis, whole fixed larvae (7-8 *dpf*) were  
574 incubated in permeabilisation/blocking buffer (PBS with 0.5% Triton-X 100 and 5% normal  
575 donkey serum) for at least 10 min followed by 3-5 days incubation at 4°C with primary  
576 antibodies (chicken anti-GFP (AbCam, 13970, 1:500), goat anti-ChAT (Chemicon, AB144P,  
577 1:50), rabbit anti-PKC $\alpha$  (Sigma, P4334, 1:100)). Samples were rinsed three times in  
578 phosphate buffered saline with 0.5% Trion-X 100 and incubated for another day with  
579 secondary antibodies and Hoechst 33342 (1:5000) for nucleus staining in  
580 permeabilisation/blocking buffer. Finally, samples were washed in PBS with 0.5% Triton-X  
581 100 and mounted in mounting media (VectaShield, Vector, H-1000) for fluorescent imaging.  
582 Secondary antibodies used were as follows: Donkey anti-chicken IgG CF488A conjugate  
583 (Sigma, 1:500), Donkey anti-rabbit IgG CF568 conjugate (Sigma, 1:500), Donkey anti-goat  
584 IgG DyLight650 conjugate (BETHYL, 1:200). For photoreceptors, whole eyes were dissected  
585 from the animal at 7-8 *dpf* and subsequent tissues were subjected to immunohistochemistry  
586 as described above. Antibodies used are, a primary antibody: *zpr-1* (ZFIN, 1:50), and a  
587 secondary antibody: Donkey anti-mouse IgG DyLight649 conjugate (Jackson  
588 Immunoresearch laboratories, 1:500). Confocal images were taken on Leica TCS SP8 or

589 Olympus FV1000 using objectives 63x (HC PL APO oil CS2, Leica), 20x (HC PL APO Dry  
590 CS2, Leica), 60x (UPLSAPO oil, Olympus) or 20x (UPLSAPO oil, Olympus) at xy: 0.1-0.07  
591  $\mu\text{m}/\text{pixel}$ , and z-step: 0.25-0.3  $\mu\text{m}$  for high-resolution images and 0.7-0.5  $\mu\text{m}/\text{pixel}$ , and z-  
592 step: 2  $\mu\text{m}$  for low magnification images. Images were median-filtered and contrast and  
593 brightness were adjusted in Fiji (NIH).

594

595 **Photoreceptor densities.** Confocal image stacks of whole eyes were converted to spherical  
596 max-projection image stacks using custom-written scripts in IGOR pro 6.3 (Wavemetrics).  
597 The image plane crossing photoreceptor somata in this spherical projection was used to  
598 automatically identify cells using a threshold function in SARFIA (Dorostkar et al. 2010)  
599 running under IGOR Pro. After manual verification and correction in Fiji, photoreceptor  
600 positions were projected back onto a 3D hemi-sphere and density was calculated using  
601 custom IGOR Pro scripts. Density maps (Fig. 2a,b) are top-down views of these 3D hemi-  
602 spheres. For extracting density profiles linearised against eye position (Figs. 2c,d) we  
603 computed the mean density in a ring between 112°-145° eccentricity, whose angular centre  
604 of mass corresponds to 130°. This “3D ring” was chosen as it corresponds to the same  
605 sagittal plane as surveyed for inner retinal anatomy and function (Fig. 2e, SFig. 2).

606

607 **Data analysis.** Data analysis was performed using IGOR Pro 6.3 (Wavemetrics), Fiji (NIH)  
608 and Python 3.5 (Anaconda distribution, scikit-learn 0.18.1, scipy 0.19.0 and pandas 0.20.1).

609

610 **Pre-processing and receptive field mapping.** Regions of interest (ROIs), corresponding to  
611 individual presynaptic terminals of BCs were defined semi-automatically by custom software  
612 (D. Velychko, cf. (Baden et al. 2016)). Next, the  $\text{Ca}^{2+}$  traces for each ROI were extracted and  
613 de-trended by high-pass filtering above  $\sim 0.1$  Hz and followed by z-normalisation based on  
614 the time interval 1-6 seconds at the beginning of recordings using custom-written routines

615 under IGOR Pro. A stimulus time marker embedded in the recording data served to align the  
616  $\text{Ca}^{2+}$  traces relative to the visual stimulus with a temporal precision of 2 ms. We then  
617 mapped linear receptive fields of each ROI by computing the  $\text{Ca}^{2+}$  transient-triggered-  
618 average. To this end, we resampled the time-derivative of each trace to match the stimulus-  
619 alignment rate of 500 Hz and used thresholding above 0.7 standard deviations relative to the  
620 baseline noise to the times  $t_i$  at which Calcium transients occurred. We then computed the  
621  $\text{Ca}^{2+}$  transient-triggered average stimulus, weighting each sample by the steepness of the  
622 transient:

$$623 \quad \mathbf{F}(l, \tau) = \frac{1}{M} \sum_{i=1}^M \dot{\mathbf{c}}(t_i) \mathbf{S}(o, t_i + \tau)$$

624

625 Here,  $\mathbf{S}(l, t)$  is the stimulus (“LED” and “time”),  $\tau$  is the time lag (ranging from approx. -1,000  
626 to 350 ms) and  $M$  is the number of  $\text{Ca}^{2+}$  events. RFs are shown in z-scores for each LED,  
627 normalised to the first 50 ms of the time-lag. To select ROIs with a non-random temporal  
628 kernel, we first concatenated all four colour kernels to a single vector (X by 1) and computed  
629 the standard deviation across this vector. We used all ROIs with a standard deviation of at  
630 least two. The precise choice of this quality criterion does not have a major effect on the  
631 results.

632

633 **Feature extraction and Clustering.** For each ROI, we concatenated the kernels for all  
634 colours, forming one 2,496-dimensional vector (4 times 649) per ROI. We then denoised this  
635 vector by using the reconstruction obtained from projecting it on the first 40 PCA  
636 components, capturing ~90% of the variance. We then followed a feature extraction and  
637 clustering pipeline described previously (Baden et al. 2016). We computed three PCA  
638 features on each colour channel individually, yielding a total of 12 features. They captured  
639 between 70 and 83% of the variance per channel. We fit a Gaussian Mixture Model the data,  
640 optimizing the Bayesian Information Criterion (BIC) for the number of mixture components.

641 The covariance matrix of each cluster was chosen to be diagonal and a regularisation term  
642 of  $10^{-6}$  was added to the diagonal. The BIC curve was shallow between 22 and 27 clusters,  
643 with a minimum at 26. Spherical covariance matrices or the same covariance matrix for each  
644 cluster yielded higher BIC scores. Full covariance matrices yielded somewhat lower BIC  
645 scores with an optimum at a cluster number below 10. In this case, functionally  
646 heterogeneous clusters were grouped together. This analysis was performed in Python 3.5  
647 using scikit-learn implementations.

648

649 **Grouping of clusters into response groups.** Each cluster was allocated into one of four  
650 response groups ( $n=25$ ) or discarded ( $n=1$ ). For each cluster mean and each channel, we  
651 first calculated the peak to peak amplitude in z-scores relative to each channels baseline,  
652 defined as the first 50 ms of each kernel. If the mean difference of the mode of all amplitudes  
653 between the UV and all other channels exceeded 35, that cluster was classified as UV(B)  
654 monochromatic ( $C_{6-14}$ ). Similarly, a single cluster with mean mode amplitude below 2 was  
655 discarded ( $C_x$ ). Next, we calculated the correlation between all pairs of channels as well as  
656 the variance between amplitudes, with the mean between amplitudes normalised to 1. If the  
657 mean correlation between all pairs exceeded 0.8 (i.e. similar waveforms) and the variance of  
658 amplitudes was below 0.09 (i.e. similar amplitudes), that cluster was classified as achromatic  
659 ( $C_{1-5}$ ). Finally, to distinguish remaining chromatic ( $C_{15-20}$ ) and colour opponent clusters ( $C_{21-}$   
660  $_{25}$ ), we also computed the mean of the mode of all correlations. If the mean of correlation  
661 equalled the mean of the mode of correlations (i.e. all kernels had the same polarity), that  
662 cluster was classified as chromatic. All remaining clusters were classified as colour  
663 opponent. Following this automatic pre-sorting, we manually reallocated three clusters that  
664 were misclassified due to low amplitudes of individual kernels:  $C_{17}$  and  $C_{20}$  were moved from  
665 colour opponent to chromatic as the very low amplitudes of the R-channel led to these  
666 clusters' erroneous classification, and  $C_9$  was moved from the chromatic to the UV(B)  
667 monochromatic group as this cluster effectively only responded to UV-stimulation but the

668 overall low-amplitudes led its misclassification. Finally, we also moved  $C_{21}$  from the  
669 chromatic to the opponent group. Here, the pronounced time-course difference between  
670 UV(B) and RG that leads to a clear opponency in the early kernel period was not picked up  
671 by our automatic sorting rules.

672

673 **Histograms against eye position.** All histograms against eye position were smoothed  
674 using a circular  $60^\circ$  binomial (Gaussian) filter along the x-dimension and IPL depth  
675 histograms were in addition smoothed by a 5%-width Gaussian filter across the y-dimension.  
676 Moreover, all 2D histograms of both eye position and IPL depth (Figures 4-6) were warped  
677 to horizontally align the peaks of the major anatomical IPL layers across eye position (Fig.  
678 5a, top row). Specifically, the IPL was compressed from the top by 5% at the outwards  
679 horizon and by 5% from the bottom of the IPL at the forward horizon, where the IPL is  
680 thickest (cf. Fig. 2k).

681



682 **FIGURE LEGENDS**

683 **Figure 1 | Distribution of chromatic content in the zebrafish natural visual world. a,**  
684 Example 180° underwater photograph taken in zebrafish-inhabited waters in West Bengal,  
685 India and **b-d**, the first three principal components across the chromatic dimension (R,G,B)  
686 of the image in (a). PC1 reflects the achromatic image content, while PCs 2 and 3 (false-  
687 colour coded in shades of yellow) reflect the remaining chromatic content. **e**, Variance  
688 explained by PC3 and PC2+3 across all 31 images calculated from 5° horizontal images  
689 slices. Error-shadings in s.d.. **f**, Schematic of the custom-built hyperspectral scanner. X and  
690 Y mirrors are moved through 1000 regularly spaced positions over a 60° circular window to  
691 deflect a ~2.8° spot of light into a spectrometer and thereby build up a hyperspectral image  
692 (Baden et al. 2013; Nevala et al. 2017). **g**, Mean of n=31,000 peak-normalised underwater  
693 spectra (31 horizon-aligned scenes of 1000 pixels each) and mean spectrum of the sky in  
694 zenith above the water. Shading in s.d.. **h**, Zebrafish opsin complement (UV: U, Blue: B,  
695 Green: G, red: R), which each opsin-template multiplied with the mean underwater spectrum  
696 from (g) to estimate relative photon-catch rates in nature. Templates based on (Baden et al.  
697 2013), for discussion on spectral positions see Supplementary Materials. **i**, Enlargement and  
698 **j**, reconstruction of photographed scene (a) from scanner-data by multiplying each pixel's  
699 spectrum with each opsin template (h). Scan-reconstructions are truncated beyond 20° from  
700 the centre to remove sampling edge artefacts. **k**, Mean loadings of PCs 1-4 across all n=31  
701 scans. **l**, As (e), cumulative variance explained by PCs 2-4 calculated separately for 5°  
702 vertical slices across all n=31 scanned scenes. Error-shadings in s.d.. As before (e), most  
703 chromatic information exists at and below the horizon. **m**, Schematic summary of natural  
704 chromatic statistics and **n**, of expected behaviourally important short-wavelength specific  
705 visual requirements. Larval schematic modified from L. Griffiths.

706

707 **Figure 2 | Anisotropic retinal structure. a**, 3D confocal stack taken across the entire retina  
708 of an 8 dpf larva (*Tg(Opn1sw1:GFP)*) with all UV-cones fluorescently labelled was used for



709 semi-automated quantification of cone densities across the retina (Methods). **b**, Average  
710 densities of all four cone types and rods across the retina, based on n=6 (R), 6 (G), 5 (B), 5  
711 (U), 4 (rods) retinas (*Tg(thrb:Tomato)* for R, *zpr-1* antibody staining for G, *Tg(-*  
712 *3.5opn1sw2:mCherry)* for B, *Tg(opn1sw1:GFP)* for U, and *Tg(xops:ntr-mCherry)* for rod).  
713 Colour Scales: 0 (white) – 35,000 (black) cones mm<sup>-2</sup> or 0-9,000 rods mm<sup>-2</sup>. D, Dorsal, T,  
714 Temporal, V, Ventral. N, Nasal. **c-e**, To compare cone distributions across retinal positions  
715 (c,d), we computed densities at sagittal plane approximately aligned with the back-surface of  
716 the lens (e, Methods). This plane projects in a ~130° cone from the eye centre, with eyes  
717 rotated ~36.5° forward during prey capture (18.5° at rest, SFig. 2a,b). Cone and rod  
718 densities across the plane defined in (e) on a linear scale of the fish's egocentric visual field.  
719 Dashed lines indicate the forward and outward horizon. (d) is as (c), plotted in polar  
720 coordinates relative to the body of the fish as indicated. **f**, Whole-eye immunostaining of an 8  
721 *dpf* *Tg(-1.8ctbp2:SyGCaMP6)* larvae labelled against green-fluorescent protein (GFP,  
722 bipolar cell (BC) terminals, green), choline acetyltransferase (ChAT, cholinergic amacrine  
723 cells, cyan) and protein kinase C alpha (PKC $\alpha$ , On-BCs, magenta). Shown is the same  
724 sagittal section used in (f-h). Scalebar 50  $\mu$ m. OPL, outer plexiform layer; INL, inner nuclear  
725 layer; IPL, inner plexiform layer; GCL, ganglion cell layer. **g-j**, Higher magnification sections  
726 from (f) showing the IPL at different positions across the eye as indicated. For clarity,  
727 GFP/PKC $\alpha$  (g<sub>1</sub>-j<sub>1</sub>) and ChAT/PKC $\alpha$  (g<sub>2</sub>-j<sub>2</sub>) are shown separately. Scalebar 5  $\mu$ m. **k**, Mean IPL  
728 thickness across n=5 whole-eye immunostainings as in (f) and **l**, mean signal in the three  
729 fluorescence channels as above.

730

731 **Figure 3 | Surveying inner retinal chromatic responses *in vivo*.** **a**, 2-photon scan-field  
732 (32 x 64 pixels, 15.625 Hz) of a nasal IPL section (outward horizon) in a *Tg(-*  
733 *1.8ctbp2:SyGCaMP6)* larvae for simultaneous recording of light-driven calcium responses  
734 across the entire IPL depth at single terminal resolution (top) and regions of interest (ROIs,  
735 bottom). Scalebar 5  $\mu$ m. **b**, example of calcium responses to tetrachromatic binary white

736 noise stimulation (12.8 Hz, Methods) of two ROIs highlighted in (a). **c**, tetrachromatic linear  
737 filters (“kernels”) recovered by reverse correlation of each ROI’s response with the noise  
738 stimulus (b). The colour code indicates the stimulus channel (R, G, B, U cf. SFig. 3a). **d**, For  
739 each stimulus channel, we classified each ROI’s kernel as either “On” (in red, green, blue or  
740 purple), “Off” (black), or non-responding (no marker) and plotted each response over the  
741 anatomical scan image (Methods). **e**, By comparison across the four stimulus channels, we  
742 then classified each ROI as either achromatic “Off” (R+G+B+U Off, black) or “On”  
743 (R+G+B+U On, white), Colour opponent (any opposite polarity responses in a single ROI,  
744 orange) or “other” (grey) and again plotted each ROI across the IPL to reveal clear chromatic  
745 and achromatic layering in this scan. **f,g**, As (d,e), but for a scan taken in the temporo-  
746 ventral retina which surveys the world in front of the animal just above the visual horizon.  
747 This zone is critical for prey capture, and was thus dubbed “strike zone”. **h-k**, Distribution of  
748 all On- and Off-responses per stimulus channel (h, red; i, green; j, blue; k, UV) based on n =  
749 4,099 / 6,565 ROIs that passed a minimum quality criterion (Methods) sampled from across  
750 the entire sagittal plane (115 scans, 12 fish).

751

752 **Figure 4 | The functional organisation of the larval zebrafish eye.** Mixture of Gaussian  
753 clustering of all n=4,099 responding terminals based on the full waveforms of their  
754 tetrachromatic kernels, with cluster number limited by the Bayesian Information Criterion  
755 (BIC), yielded 25 clusters (C<sub>1-25</sub>) and 1 discard cluster (C<sub>x</sub>). For simplicity, each cluster was  
756 further allocated to one of four major response groups (Methods): **a**, achromatic (C<sub>1-5</sub>), **b**,  
757 UV(B)-monochromatic (C<sub>6-14</sub>), **c**, chromatic (C<sub>15-20</sub>) and **d**, colour opponent (C<sub>21-25</sub>). **e**,  
758 Discard cluster C<sub>x</sub>. For each cluster, shown are the time-course of each kernel (left  
759 heatmaps, lighter shades indicating higher values), the cluster-means (middle) and their  
760 anatomical distribution across IPL depth (y axis) and position in the eye (x-axis, right  
761 heatmaps, lighter shades indicate higher abundance). Dashed lines indicate the forward and  
762 outwards horizon, the asterisk denotes the position of the strike zone. The height of each

763 cluster's left heatmap indicates its number of allocated terminals. **f-h**, Linear (left) and polar  
764 (right) histograms of terminal abundance of the functional groups defined in (a-e) across the  
765 larval zebrafish's visual space. **f**, UV(B)-monochromatic (purple) and achromatic (grey)  
766 groups, **g**, chromatic (yellow) and colour opponent (orange) groups, **h**, summed UV(B)-  
767 monochromatic and achromatic groups (grey) versus chromatic and colour opponent groups  
768 (brown).

769

770 **Figure 5 | Distribution of function across the IPL.** **a**, Histograms of terminal abundance  
771 across IPL depth (y axis) and position in the eye (set of histograms) for each functional  
772 group (cf. Fig. 7), divided by On- and Off-dominated responses as indicated. In addition, the  
773 distribution of all  $n = 6,565$  scanned terminals independent of response-quality is plotted to  
774 reveal the anatomical distribution of all BC terminals (top, light grey). Heatmaps to the right  
775 show the same data in a single image. Asterisk denotes the position of the strike zone.  
776 Dashed lines indicate the forward and outward visual horizon. Solid horizontal lines indicate  
777 the position of the lower ChAT band as an anatomical reference. **b<sub>1-4</sub>**, On/Off-collapsed  
778 histograms of the four response groups for four example regions (up: ventral, strike zone:  
779 temporo-ventral, down: dorsal and outward horizon: nasal as indicated) summarise the  
780 functional IPL layering across eye positions, with approximate anatomical layers indicated in  
781 the background shading. For clarity, achromatic and UV(B)-monochromatic histograms are  
782 x-axis-reversed. **c**, Colour-coded response groups (top) plotted against eye position (x) and  
783 IPL depth (y) and merge (bottom). Throughout, colours indicate the functional groups:  
784 Achromatic (grey/black), UV(B)-monochromatic (purple/violet), chromatic (yellow/beige) and  
785 colour opponent (orange/brown).

786

787 **Figure 6 | Distribution of genetically defined BC-types.** **a**, High-resolution 2-photon scan  
788 of a ventro-nasal (up/outward) IPL section in 7 *dpf* larvae expressing SyGCaMP6f under

789 *ctbp2* promoter (green) as well as mCherry under *xfz43* (red). Scalebar 5  $\mu$ m. **b**, Subsequent  
790 higher rate scans during light-stimulation allowed recovering tetrachromatic kernels from  
791 individual *xfz43*-positive terminals as before (right). **c**, Distribution of 392 / 620 *xfz43*-positive  
792 BC terminals (64 scans, 5 fish) that passed our response criterion (red, Methods) across the  
793 IPL (y) and eye (x), superimposed on the distribution of all terminals from the same scans  
794 (green). The heatmap on the right shows only *xfz43* positive terminals. Dashed lines indicate  
795 the forward and outward horizon, while the solid horizontal line indicates the position of the  
796 lower ChAT band. **d**, Allocation of all *xfz43*-positive anatomical Off terminals to functional  
797 clusters (right) and distribution of these terminals across the eye by functional group (left). **e**,  
798 As (d), but for *xfz43*-positive anatomical On-cells.

799

800 **Figure 7 | The larval zebrafish eye's chromatic organisation for vision in nature. a**,  
801 Circuits for colour vision are generally biased to the horizon and lower visual field where  
802 most chromatic content is found in nature. **b**, Circuits for UV(B)-monochromatic vision  
803 dominate the upper and frontal visual field and may be used for prey-capture and the  
804 detection of UV-dark silhouettes against a UV-bright background. **c**, Achromatic circuits are  
805 found throughout the eye, with On- and Off- circuits dominating the upper-frontal and lower-  
806 outward facing visual fields, respectively. **d**, Rod-circuits are exclusively used to survey the  
807 sky directly above and the ground reflection directly beneath the animal, where most  
808 photons can be caught. In each image, the triangular area above the animal depicts Snell's  
809 window, and the visual horizon is indicated by a dashed line.

810

811 **SUPPLEMENTARY MATERIALS**

812

813 **The cone-opsin complement of zebrafish.** While larval (and adult) zebrafish have four  
814 cone-types and one rod-type, each cone's *in vivo* action spectrum depends on several  
815 factors, including which opsin gene(s) are expressed, which retinal chromophore(s) are  
816 used, and what fraction of the spectrum of light is filtered out by the optical apparatus. To  
817 justify the choice of opsin templates used (cf. SFig. 3a) we will discuss each in turn.

818 Zebrafish have UV, blue, green and red sensitive cones in their retina. The maximal  
819 absorbance ( $\lambda_{\max}$ ) for the UV sensitive cones (UVS) lies around 360-365 nm while the  $\lambda_{\max}$   
820 for the blue sensitive cones (SWS, short wavelength sensitive cone) is at 411nm (Allison et  
821 al. 2004; Hunt et al. 2001). For green and red cones (medium and long wavelength sensitive  
822 cones, MWS and LWS) the situation is more complex since these cones can express  
823 different types of opsins. Zebrafish use four MWS-cone opsins (RH2-1, RH2-2, RH2-3 and  
824 RH2-4) and two LWS-cone opsins (LWS1 and LWS2) (Chinen et al. 2003). All these opsins  
825 have different spectral sensitivities, and all are expressed in the retina (Takechi & Kawamura  
826 2005). This variation is expected in a small spectral sensitivity shift in these cones with  
827 retinal position. Based on the abundance of the opsin type across the retina for the green  
828 and red cones during the early development of zebrafish larvae, we chose the most  
829 abundant opsin type in each case: the RH2-1 gene ( $\lambda_{\max}$  at 467 nm) for the green cones and  
830 the LWS1 gene ( $\lambda_{\max}$  at 548 nm) for the red cones.

831 In addition, vertebrates can use two different chromophores: 11-cis-retinal (vitamin A1) and  
832 11-cis-3,4-didehydroretinal (vitamin A2). The A2 chromophore holds one extra double bond  
833 compared to A1, which lowers the energy needed to initiate the phototransduction cascade  
834 (Enright et al. 2015; Koskelainen et al. 2000; Loew & Dartnall 1976). By changing the  
835 chromophore from A1 to A2, a visual pigment's peak spectral sensitivity can be shifted to  
836 longer wavelengths. While for UVS- and SWS-opsins, this switch has little effect, MWS-

837 opsins can be shifted by 20 nm, while LWS-opsins shift up to 60 nm (Allison et al., 2004).  
838 This change can be triggered in adult zebrafish when treated with thyroid hormone (Allison  
839 et al., 2004; Enright et al., 2015), but there is no clear evidence for the zebrafish of any age  
840 holding the A2 chromophore under normal conditions. We therefore assumed that only the  
841 A1 chromophore is present. As such,  $\lambda_{\max}$  values for the cone templates were set to 365 nm,  
842 411 nm, 467 nm and 548 nm for the four cone types, respectively.

843 Other possible structures in the eye filtering the light reaching the light sensitive cells are the  
844 cornea, the lens and the vitreous body. All these parts can hold patches of pigments that  
845 mostly absorb shorter wavelengths (UV) affecting the spectrum of light that eventually  
846 reaches the photoreceptors (Douglas & McGuigan 1989). Whether or not the animal has  
847 these pigments varies widely across different species (Siebeck & Marshall 2001), but  
848 measurements are still lacking for the larval zebrafish. Notably, here the small size of the  
849 eye, and the fact that UV-cones exist throughout the retina, strongly suggest that UV-filtering  
850 by the optical apparatus in these animals is negligible. As such, we did not correct our opsin  
851 templates for any putative spectral related to the optical apparatus of the eye.

852

853 **The number of neurons in the 7-8 dpf larval zebrafish.** Our photoreceptor-labelling  
854 experiments (Fig. 2) revealed that at 7-8 dpf, a single eye comprises approximately 10,000  
855 photoreceptors (all cones and rods combined). From here, we then estimated HC and BC  
856 numbers as ~1,000 and ~25,000, assuming these neuron classes comprise 4 (HC) and 25  
857 (BC) types that each tile the retina with no overlap, with each type on average contacting 30  
858 (HC) and 10 (BC) PRs (D'Orazi et al. 2016; Li et al. 2009; Vitorino et al. 2009; Song et al.  
859 2008). Finally, there are ~4,000 RGCs in the larval zebrafish eye (Robles et al. 2014), and  
860 from here we assumed that ACs make up at least another 4,000 neurons. This puts the total  
861 number of neurons for both eye added up ~88,000. In comparison to ~85,000-100,000  
862 neurons in the brain excluding the eyes (Naumann et al. 2010), this estimate implies that  
863 about half the brain's neurons are located in the eyes.

864 **Choice of age of zebrafish larvae.** Throughout this work we used 7-8 *dpf* zebrafish larvae  
865 of either sex. At this age, zebrafish brain and retina conform to the anatomical structures of  
866 vertebrate nervous system, such as existence of canonical cell types and specific neural  
867 circuits (McLean & Fetcho 2011; Hoon et al. 2014). Supported by their visual circuits, 7-8 *dpf*  
868 zebrafish larvae perform a wide range of behaviours including reflexive responses as well as  
869 prey-capture and predator avoidance (Orger 2016; Friedrich et al. 2010), allowing them to  
870 feed independently, navigate their environment and avoid predators. Though under constant  
871 development, larval zebrafish of this age are therefore fully autonomous and highly visual  
872 animals. They have been used extensively to study vertebrate nervous system organisation  
873 and function including benchmark studies of whole-brain functional imaging (Keller et al.  
874 2014) and serial-section electron microscopy (Hildebrand et al. 2017).

875

876 **SUPPLEMENTARY FIGURE LEGENDS**

877 **Supplementary Figure 1 | related to Figure 1: Distribution of chromatic content in the**  
878 **zebrafish natural visual world. a**, Location of field sites visited in West Bengal, India. **b**,  
879 Mean of n=31 action camera images and **c**, mean z-normalised brightness of the red, green  
880 and blue camera channels across these scenes. **d**, As (c), with mean between all 3 channels  
881 subtracted to highlight the differences between the three channels. Errors in c,d in s.e.m. **e**,  
882 Principal components 1-4 (left to right) of the hyperspectral example image shown in Fig. 1j,  
883 (cf. Fig. 1b-d). **f**, Achromatic-mean-subtracted mean luminance of the 4 opsin channels from  
884 the same scene (like in d). Errors in s.e.m..

885

886 **Supplementary Figure 2 | related to Figure 2: Anisotropic retinal structure. a**,  
887 Transverse plane (looking down onto the fish from the top) immunolabelled 7 dpf larval  
888 zebrafish eye with bipolar cell terminals in green (like Fig. 2i) highlights the ~130° visual  
889 angle surveyed by the sagittal plane used throughout this work (indicated in red). **b**, 3D  
890 illustrations of the field of view covered by this sagittal plane during “rest” (eyes tilted forward  
891 ~18.5°) and during prey-capture (“hunting”, eyes at 35.5°) as indicated. In the top left panel,  
892 the ~163° full field of view of the eye is indicated in addition to the 130° field surveyed in this  
893 work.

894

895 **Supplementary Figure 3 | related to Figure 3: Surveying inner retinal chromatic**  
896 **responses *in vivo*. a**, Cone action spectra (thin lines) plotted on top of effective LED  
897 spectra as measured at the sample plane (black lines) and each LED’s spectral cross-  
898 section with respective target cone in solid colours. Grey boxes indicate the positions of the  
899 two detector bands. Cross activation efficiencies between LEDs and each cone action  
900 spectrum are listed in the inset. **b**, Histogram of quality criterion (Methods) for all recorded  
901 terminals with cut-off value of 2 z-scores indicated and **c**, distribution of all (light) and



902 selected (dark) terminals across the eye. **d**, Distribution of R, G, B, U Off- and On-  
903 responses across the IPL depth (vertical axis) and eye position (horizontal axis) as indicated  
904 (cf. Figs. 3h-k). The insets to the right show the same data plotted as heatmaps.

905

906 **Supplementary Figure 4 | related to Figure 6: Distribution of genetically defined BC-**  
907 **types. a**, Distribution of xfz43-positive BC responses split by polarity (Off / On) and allocated  
908 major response group plotted against IPL depth (vertical axis) and eye position (horizontal  
909 axis). **b**, Same data as (a), plotted as heatmaps.

910 **Author contributions**

911 MJYZ, NEN, TY and TB designed the study, with help from DEN, DO and PB; MJYZ and TY  
912 performed 2-photon imaging experiments and immunohistochemistry; TY generated all novel  
913 zebrafish lines; NEN and TB built the hyperspectral scanner and performed field work; NEN,  
914 MJYZ and TY performed pre-processing with inputs from TB; PB developed the clustering  
915 framework; TB analysed the data with help from all authors; TB wrote the manuscript with  
916 help from PB and inputs from all authors.

917

918 **Acknowledgements**

919 We thank Kripan Sarkar and Fredrik Jutfeld for help with fieldwork, Leon Lagnado for the  
920 provision of zebrafish lines and critical feedback and Thomas Euler for critical feedback. The  
921 authors would also like to acknowledge support from the FENS-Kavli Network of Excellence.  
922 Funding was provided by the European Research Council (ERC-StG “NeuroVisEco” 677687  
923 to TB), Marie Curie Sklodowska Actions individual fellowship (“ColourFish” 748716 to TY),  
924 Marie Sklodowska-Curie European Training network “Switchboard” (Switchboard receives  
925 funding from the European Union’s Horizon 2020 research and innovation programme under  
926 the Marie Sklodowska-Curie grant agreement No. 674901), The Deutsche  
927 Forschungsgemeinschaft (DFG: BA 5283/1-1 to TB, BE 5601/1-1 to PB), The Medical  
928 Research Council (MC\_PC\_15071 to TB). The Federal Ministry of Education and Research  
929 of Germany through the Bernstein Award for Computational Neuroscience (FKZ 01GQ1601  
930 to PB).

931

932 **REFERENCES**

- 933 Allison, W.T. et al., 2004. Visual pigment composition in zebrafish: Evidence for a  
934 rhodopsin–porphyropsin interchange system. *Visual Neuroscience*, 21(6):945–52.
- 935 Arunachalam, M. et al., 2013. Natural history of zebrafish (*Danio rerio*) in India. *Zebrafish*,  
936 10(1):1–14.
- 937 Attneave, F., 1954. Some informational aspects of visual perception. *Psychological review*,  
938 61(3):183–93.
- 939 Avdesh, A. et al., 2010. Natural Colour Preference in the Zebrafish (*Danio rerio*).  
940 *Proceedings of Measuring Behaviour*, 155–57.
- 941 Baden, T. et al., 2013. A tale of two retinal domains: near-optimal sampling of achromatic  
942 contrasts in natural scenes through asymmetric photoreceptor distribution. *Neuron*,  
943 80(5):1206–17.
- 944 Baden, T. et al., 2016. The functional diversity of retinal ganglion cells in the mouse. *Nature*,  
945 529(7586):345–50.
- 946 Barlow, H.B.H., 1961. Possible principles underlying the transformation of sensory  
947 messages. In *Sensory Communication*. 217–34.
- 948 Behrens, C., Schubert, T., Haverkamp, S., Euler, T., Berens, P., et al., 2016. Connectivity  
949 map of bipolar cells and photoreceptors in the mouse retina. *eLife*, 5:1206–17.
- 950 Bianco, I.H., Kampff, A.R. & Engert, F., 2011. Prey Capture Behavior Evoked by Simple  
951 Visual Stimuli in Larval Zebrafish. *Frontiers in Systems Neuroscience*, 5:101.
- 952 Bleckert, A. et al., 2014. Visual space is represented by nonmatching topographies of  
953 distinct mouse retinal ganglion cell types. *Current Biology*, 24(3):310–5.
- 954 Breuninger, T. et al., 2011. Chromatic bipolar cell pathways in the mouse retina. *The Journal*  
955 *of Neuroscience*, 31(17): 6504–17.

- 956 Buchsbaum, G. & Gottschalk, A., 1983. Trichromacy, opponent colours coding and optimum  
957 colour information transmission in the retina. *Proceedings of the Royal Society of*  
958 *London B*, 220(1218):89–113.
- 959 Calderone, J.B. & Jacobs, G.H., 1995. Regional variations in the relative sensitivity to UV  
960 light in the mouse retina. *Visual Neuroscience*, 12(3):463–68.
- 961 Chang, L., Breuninger, T. & Euler, T., 2013. Chromatic coding from cone-type unselective  
962 circuits in the mouse retina. *Neuron*, 77(3):559–71.
- 963 Chiao, C.C., Cronin, T.W. & Osorio, D., 2000. Color signals in natural scenes: characteristics  
964 of reflectance spectra and effects of natural illuminants. *Journal of the Optical Society*  
965 *of America. A*, 17(2):218–24.
- 966 Chichilnisky, E.J., 2001. A simple white noise analysis of neuronal light. *Network*  
967 *Computation in Neural Systems*, 12(2):199–213.
- 968 Chinen, A. et al., 2003. Gene duplication and spectral diversification of cone visual pigments  
969 of zebrafish. *Genetics*, 163(2):663–675.
- 970 Connaughton, V.P. & Nelson, R., 2000. Axonal stratification patterns and glutamate-gated  
971 conductance mechanisms in zebrafish retinal bipolar cells. *The Journal of Physiology*,  
972 524:135–46.
- 973 Cronin, T.W. et al., 2014. *Visual Ecology* 1st ed., Princeton University Press.
- 974 Cronin, T.W. & Bok, M.J., 2016. Photoreception and vision in the ultraviolet. *The Journal of*  
975 *Experimental Biology*, 219(18):2790–801.
- 976 D’Orazi, F.D. et al., 2016. Mismatch of Synaptic Patterns between Neurons Produced in  
977 Regeneration and during Development of the Vertebrate Retina. *Current Biology*,  
978 26(17):2268–79.
- 979 Dorostkar, M.M. et al., 2010. Computational processing of optical measurements of neuronal

- 980           and synaptic activity in networks. *Journal of Neuroscience Methods*, 188(1):141–50.
- 981   Douglas, R.H. & McGuigan, C.M., 1989. The spectral transmission of freshwater teleost  
982           ocular media-An interspecific comparison and a guide to potential ultraviolet sensitivity.  
983           *Vision Research*, 29(7):871–9.
- 984   Dreosti, E. et al., 2009. A genetically encoded reporter of synaptic activity in vivo. *Nature*  
985           *Methods*, 6(12):883–9.
- 986   Dunn, T.W. et al., 2016. Neural Circuits Underlying Visually Evoked Escapes in Larval  
987           Zebrafish. *Neuron*, 89(3):613–28.
- 988   Dyakova, O. & Nordström, K., 2017. Image statistics and their processing in insect vision.  
989           *Current Opinion in Insect Science*. 24:7-14.
- 990   Easter, Jr., S.S. & Nicola, G.N., 1996. The Development of Vision in the Zebrafish (*Danio*  
991           *rerio*). *Developmental Biology*, 180(2):646–63.
- 992   Endeman, D., Klaassen, L.J. & Kamermans, M., 2013. Action Spectra of Zebrafish Cone  
993           Photoreceptors. *PLoS ONE*, 8(7):e68540.
- 994   Engeszer, R.E. et al., 2007. Zebrafish in The Wild: A Review of Natural History And New  
995           Notes from The Field. *Zebrafish*, 4(1):21-40.
- 996   Engström, K., 1960. Cone types and cone arrangements in the retina of some cyprinids.  
997           *Acta Zool*, 41:277–95.
- 998   Enright, J.M. et al., 2015. Cyp27c1 red-shifts the spectral sensitivity of photoreceptors by  
999           converting Vitamin A1 into A2. *Current Biology*, 25(23):3048–57.
- 1000   Euler, T. et al., 2009. Eyecup scope--optical recordings of light stimulus-evoked fluorescence  
1001           signals in the retina. *Pflügers Archiv : European Journal of Physiology*, 457(6):1393–  
1002           414.
- 1003   Euler, T. et al., 2014. Retinal Bipolar Cells: Elementary Building Blocks of Vision. *Nature*

- 1004        *Reviews Neuroscience*, 15:507–519.
- 1005        Fadool, J.M., 2003. Development of a rod photoreceptor mosaic revealed in transgenic  
1006        zebrafish. *Developmental Biology*, 258(2):277–90.
- 1007        Famiglietti, E.V. Jr., 1983. “Starburst” amacrine cells and cholinergic neurons: mirror-  
1008        symmetric on and off amacrine cells of rabbit retina. *Brain Res*, 261(1), pp.138–144.
- 1009        Flamarique, I.N., 2016. Diminished foraging performance of a mutant zebrafish with reduced  
1010        population of ultraviolet cones. *Proceedings. Biological sciences / The Royal Society*,  
1011        283(1826):20160058.
- 1012        Franke, K. et al., 2017. Inhibition decorrelates visual feature representations in the inner  
1013        retina. *Nature*, 542(7642):439–44.
- 1014        Friedrich, R.W., Jacobson, G.A. & Zhu, P., 2010. Circuit Neuroscience in Zebrafish. *Current*  
1015        *Biology*, 20(8):371-81.
- 1016        Goldsmith, T.H., 1994. Ultraviolet receptors and color vision: evolutionary implications and a  
1017        dissonance of paradigms. *Vis.Res.*, 34(11):1479–87.
- 1018        Greene, M.J., Kim, J.S. & Seung, H.S., 2016. Analogous Convergence of Sustained and  
1019        Transient Inputs in Parallel On and Off Pathways for Retinal Motion Computation. *Cell*  
1020        *Rep*, 14(8):1892-900.
- 1021        Haug, M.F. et al., 2010. Visual acuity in larval zebrafish: behavior and histology. *Frontiers in*  
1022        *Zoology*, 7:8.
- 1023        Helmstaedter, M. et al., 2013. Connectomic reconstruction of the inner plexiform layer in the  
1024        mouse retina. *Nature*, 500(7461):168–74.
- 1025        Hildebrand, D.G.C. et al., 2017. Whole-brain serial-section electron microscopy in larval  
1026        zebrafish. *Nature*, 545(7654):345–349.
- 1027        Hoon, M. et al., 2014. Functional architecture of the retina: Development and disease.

- 1028            *Progress in Retinal and Eye Research*, 42:44–84.
- 1029    Hunt, D.M. et al., 2001. Vision in the ultraviolet. *Cellular and molecular life sciences*,  
1030            58(11):1583–98.
- 1031    Janssen, J., 1981. Searching for Zooplankton Just Outside Snell's Window.  
1032            *Limnol. Oceanogr.*, 26(6):1168–71.
- 1033    Jerlov, N.G., 1976. *Marine Optics*. Elsevier Oceanograph Series (14), 2<sup>nd</sup> Edition.
- 1034    Joesch, M. & Meister, M., 2016. A neuronal circuit for colour vision based on rod–cone  
1035            opponency. *Nature*, 532(7598):236-9.
- 1036    Johnston, J. et al., 2014. Rapid mapping of visual receptive fields by filtered back projection:  
1037            application to multi-neuronal electrophysiology and imaging. *The Journal of Physiology*,  
1038            592(22):4839–54.
- 1039    Karlsson, J., von Hofsten, J. & Olsson, P.E., 2001. Generating transparent zebrafish: a  
1040            refined method to improve detection of gene expression during embryonic  
1041            development. *Marine Biotechnology*, 3(6):522–7.
- 1042    Keller, P.J., Ahrens, M.B. & Freeman, J., 2014. Light-sheet imaging for systems  
1043            neuroscience. *Nature Methods*, 12(1):27–9.
- 1044    Kim, J.S. et al., 2014. Space–time wiring specificity supports direction selectivity in the  
1045            retina. *Nature*, 509(7500):331–6.
- 1046    Koskelainen, A. et al., 2000. Measurement of thermal contribution to photoreceptor  
1047            sensitivity. *Nature*, 403(6766):220–3.
- 1048    Land, M. & Nilson, D.-E., 2012. *Animal Eyes*, Oxford University Press.
- 1049    Larison, K.D. & Bremiller, R., 1990. Early onset of phenotype and cell patterning in the  
1050            embryonic zebrafish retina. *Development*. 109:567–76.
- 1051    Lewis, A. & Zhaoping, L., 2006. Are cone sensitivities determined by natural color statistics?

- 1052 *Journal of vision*, 6(3):285–302.
- 1053 Li, Y.N. et al., 2012. Bipolar cell-photoreceptor connectivity in the zebrafish (*Danio rerio*)  
1054 retina. *The Journal of Comparative Neurology*, 520(16):3786–802.
- 1055 Li, Y.N., Matsui, J.I. & Dowling, J.E., 2009. Specificity of the horizontal cell-photoreceptor  
1056 connections in the zebrafish (*Danio rerio*) retina. *The Journal of Comparative*  
1057 *Neurology*, 516(5):442–53.
- 1058 Loew, E.R. & Dartnall, H.J.A., 1976. Vitamin A1/A2-based visual pigment mixtures in cones  
1059 of the rudd. *Vision Research*, 16(9):891–6.
- 1060 Losey, G.S. et al., 1999. The UV visual world of fishes: a review. *Journal of Fish Biology*,  
1061 54(5):921–43.
- 1062 Masland, R.H., 2001. The fundamental plan of the retina. *Nature Neuroscience*, 4(9):877–  
1063 86.
- 1064 McLean, D.L. & Fetcho, J.R., 2011. Movement, technology and discovery in the zebrafish.  
1065 *Current Opinion in Neurobiology*, 21(1):110–5.
- 1066 Mehta, B. et al., 2013. Synaptic ribbons influence the size and frequency of miniature-like  
1067 evoked postsynaptic currents. *Neuron*, 77(3):516–27.
- 1068 Morris, D.P. et al., 1995. The attenuation of solar UV radiation in lakes and the role of  
1069 dissolved organic carbon. *Limnology and Oceanography*, 40(8):1381–91.
- 1070 Mueller, K.P. & Neuhauss, S.C.F., 2014. Sunscreen for fish: co-option of UV light protection  
1071 for camouflage. *PloS ONE*, 9(1):e87372.
- 1072 Muto, A. et al., 2017. Activation of the hypothalamic feeding centre upon visual prey  
1073 detection. *Nature Communications*, 8:15029.
- 1074 Muto, A. & Kawakami, K., 2013. Prey capture in zebrafish larvae serves as a model to study  
1075 cognitive functions. *Frontiers in Neural Circuits*, 7:110.



- 1076 Naumann, E.A. et al., 2010. Monitoring neural activity with bioluminescence during natural  
1077 behavior. *Nature Neuroscience*, 13(4):513–20.
- 1078 Nava, S.S., An, S. & Hamil, T., 2011. Visual detection of UV cues by adult zebrafish (*Danio*  
1079 *rerio*). *Journal of Vision*, 11(6):2.
- 1080 Nevala, N.E. et al., 2017. Mapping the Natural Visual World of Zebrafish (*Danio rerio*).  
1081 *F1000 Posters*.
- 1082 Nevin, L.M., Taylor, M.R. & Baier, H., 2008. Hardwiring of fine synaptic layers in the  
1083 zebrafish visual pathway. *Neural Development*, 3(1):36.
- 1084 Novales Flamarique, I., 2012. Opsin switch reveals function of the ultraviolet cone in fish  
1085 foraging. *Proceedings of the Royal Society of London B: Biological Sciences*,  
1086 280(1752):20122490.
- 1087 Orger, M.B., 2016. The Cellular Organization of Zebrafish Visuomotor Circuits. *Current*  
1088 *Biology*, 26(9):377–85.
- 1089 Parichy, D.M., 2015. Advancing biology through a deeper understanding of zebrafish  
1090 ecology and evolution. *eLife*, 4: e05635.
- 1091 Patterson, B.W. et al., 2013. Visually guided gradation of prey capture movements in larval  
1092 zebrafish. *Journal of Experimental Biology*, 216(16):3071–83.
- 1093 Pita, D. et al., 2015. Vision in two cyprinid fish: implications for collective behavior. *PeerJ*,  
1094 3:e1113.
- 1095 Preuss, S.J. et al., 2014. Classification of Object Size in Retinotectal Microcircuits. *Current*  
1096 *Biology*. 24(20):2376-85.
- 1097 Robles, E., Laurell, E. & Baier, H., 2014. The Retinal Projectome Reveals Brain-Area-  
1098 Specific Visual Representations Generated by Ganglion Cell Diversity. *Current Biology*,  
1099 24(18):2085–96.

- 1100 Rosa, J.M. et al., 2016. Crossover Inhibition Generates Sustained Visual Responses in the  
1101 Inner Retina. *Neuron*, 90(2):308-19.
- 1102 Ruderman, D.L., Cronin, T.W. & Chiao, C.-C., 1998. Statistics of cone responses to natural  
1103 images: implications for visual coding. *Journal of the Optical Society of America A*,  
1104 15(8):2036.
- 1105 Sabbah, S. et al., 2017. A retinal code for motion along the gravitational and body axes.  
1106 *Nature*, 546:492-7.
- 1107 Salbreux, G. et al., 2012. Coupling Mechanical Deformations and Planar Cell Polarity to  
1108 Create Regular Patterns in the Zebrafish Retina S. Shvartsman, ed. *PLoS*  
1109 *Computational Biology*, 8(8):e1002618.
- 1110 Schaerer, S. & Neumeier, C., 1996. Motion detection in goldfish investigated with the  
1111 optomotor response is "color blind." *Vision Research*, 36(24):4025–34.
- 1112 Schmitt, E.A. & Dowling, J.E., 1999. Early retinal development in the zebrafish, *Danio rerio*:  
1113 light and electron microscopic analyses. *The Journal of Comparative Neurology*,  
1114 404(4):515–36.
- 1115 Semmelhack, J.L. et al., 2014. A dedicated visual pathway for prey detection in larval  
1116 zebrafish. *eLife*, 3:e04878.
- 1117 Siebeck, U.E. & Marshall, N.J., 2001. Ocular media transmission of coral reef fish--can coral  
1118 reef fish see ultraviolet light? *Vision Research*, 41(2):133–49.
- 1119 Simoncelli, E.P. & Olshausen, B.A., 2001. Natural image statistics and neural  
1120 representation. *Annu Rev Neurosci*, 24:1193–216.
- 1121 Song, P.I., Matsui, J.I. & Dowling, J.E., 2008. Morphological types and connectivity of  
1122 horizontal cells found in the adult zebrafish (*Danio rerio*) retina. *Journal of Comparative*  
1123 *Neurology*, 506(2):328–38.

- 1124 Spence, R. et al., 2007. Diet, growth and recruitment of wild zebrafish in Bangladesh.  
1125 *Journal of Fish Biology*, 71(1):304–9.
- 1126 Spence, R. et al., 2008. The behaviour and ecology of the zebrafish, *Danio rerio*. *Biological*  
1127 *Reviews*, 83(1):13–34.
- 1128 Stell, W.K., 1967. The structure and relationships of horizontal cells and  
1129 photoreceptor-bipolar synaptic complexes in goldfish retina. *American Journal of*  
1130 *Anatomy*, 121(2):401–23.
- 1131 Suzuki, S.C. et al., 2013. Cone photoreceptor types in zebrafish are generated by symmetric  
1132 terminal divisions of dedicated precursors. *Proceedings of the National Academy of*  
1133 *Sciences*, 110(37):15109–14.
- 1134 Takechi, M., Hamaoka, T. & Kawamura, S., 2003. Fluorescence visualization of ultraviolet-  
1135 sensitive cone photoreceptor development in living zebrafish. *FEBS Letters*, 553(1–  
1136 2):90–4.
- 1137 Takechi, M. & Kawamura, S., 2005. Temporal and spatial changes in the expression pattern  
1138 of multiple red and green subtype opsin genes during zebrafish development. *The*  
1139 *Journal of Experimental Biology*, 208(7):1337–45.
- 1140 Temizer, I. et al., 2015. A Visual Pathway for Looming-Evoked Escape in Larval Zebrafish.  
1141 *Current Biology*, 25(14):1823–34.
- 1142 Trivedi, C.A. & Bollmann, J.H., 2013. Visually driven chaining of elementary swim patterns  
1143 into a goal-directed motor sequence: a virtual reality study of zebrafish prey capture.  
1144 *Frontiers in Neural Circuits*, 7:86.
- 1145 Vitorino, M. et al., 2009. *Vsx2* in the zebrafish retina: restricted lineages through  
1146 derepression. *Neural Development*, 4(1):14.
- 1147 Wässle, H. et al., 2009. Cone contacts, mosaics, and territories of bipolar cells in the mouse  
1148 retina. *The Journal of Neuroscience*, 29(1):106–17.

- 1149 Wässle, H., 2004. Parallel processing in the mammalian retina. *Nature Reviews*  
1150 *Neuroscience*, 5(10):747–57.
- 1151 Webster, M.A. & Mollon, J.D., 1997. Adaptation and the color statistics of natural images.  
1152 *Vision Research*, 37(23):3283–98.
- 1153 Wong, K.Y. & Dowling, J.E., 2005. Retinal bipolar cell input mechanisms in giant danio. III.  
1154 ON-OFF bipolar cells and their color-opponent mechanisms. *Journal of*  
1155 *Neurophysiology*, 94(1):265–72.
- 1156 Yilmaz, M. & Meister, M., 2013. Rapid Innate Defensive Responses of Mice to Looming  
1157 Visual Stimuli. *Current Biology*, 23(20):2011–5.
- 1158 Zhang, Y. et al., 2012. The most numerous ganglion cell type of the mouse retina is a  
1159 selective feature detector. *Proceedings of the National Academy of Sciences of the*  
1160 *United States of America*, 109(36):e2391-8.
- 1161 Zhao, X.-F., Ellingsen, S. & Fjose, A., 2009. Labelling and targeted ablation of specific  
1162 bipolar cell types in the zebrafish retina. *BMC Neuroscience*, 10:107.

Figure 1 - Distribution of chromatic content in the zebrafish natural visual world

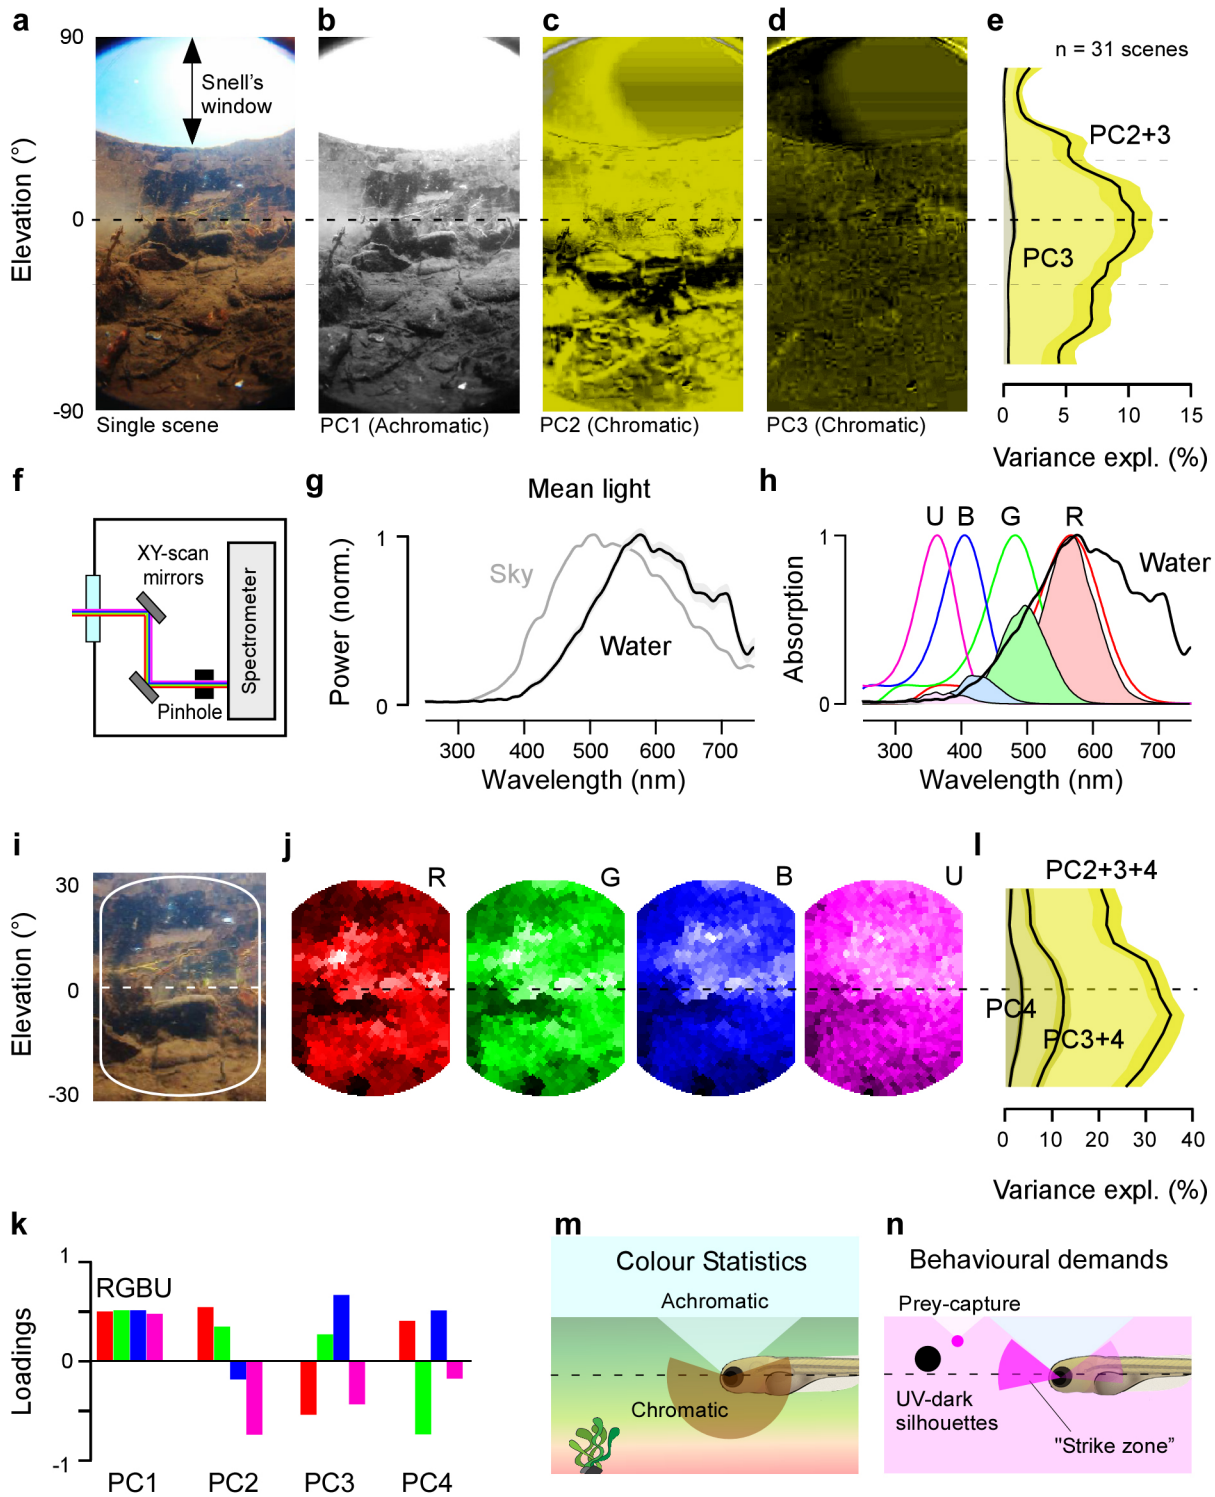



Figure 2 - Anisotropic retinal ultrastructure

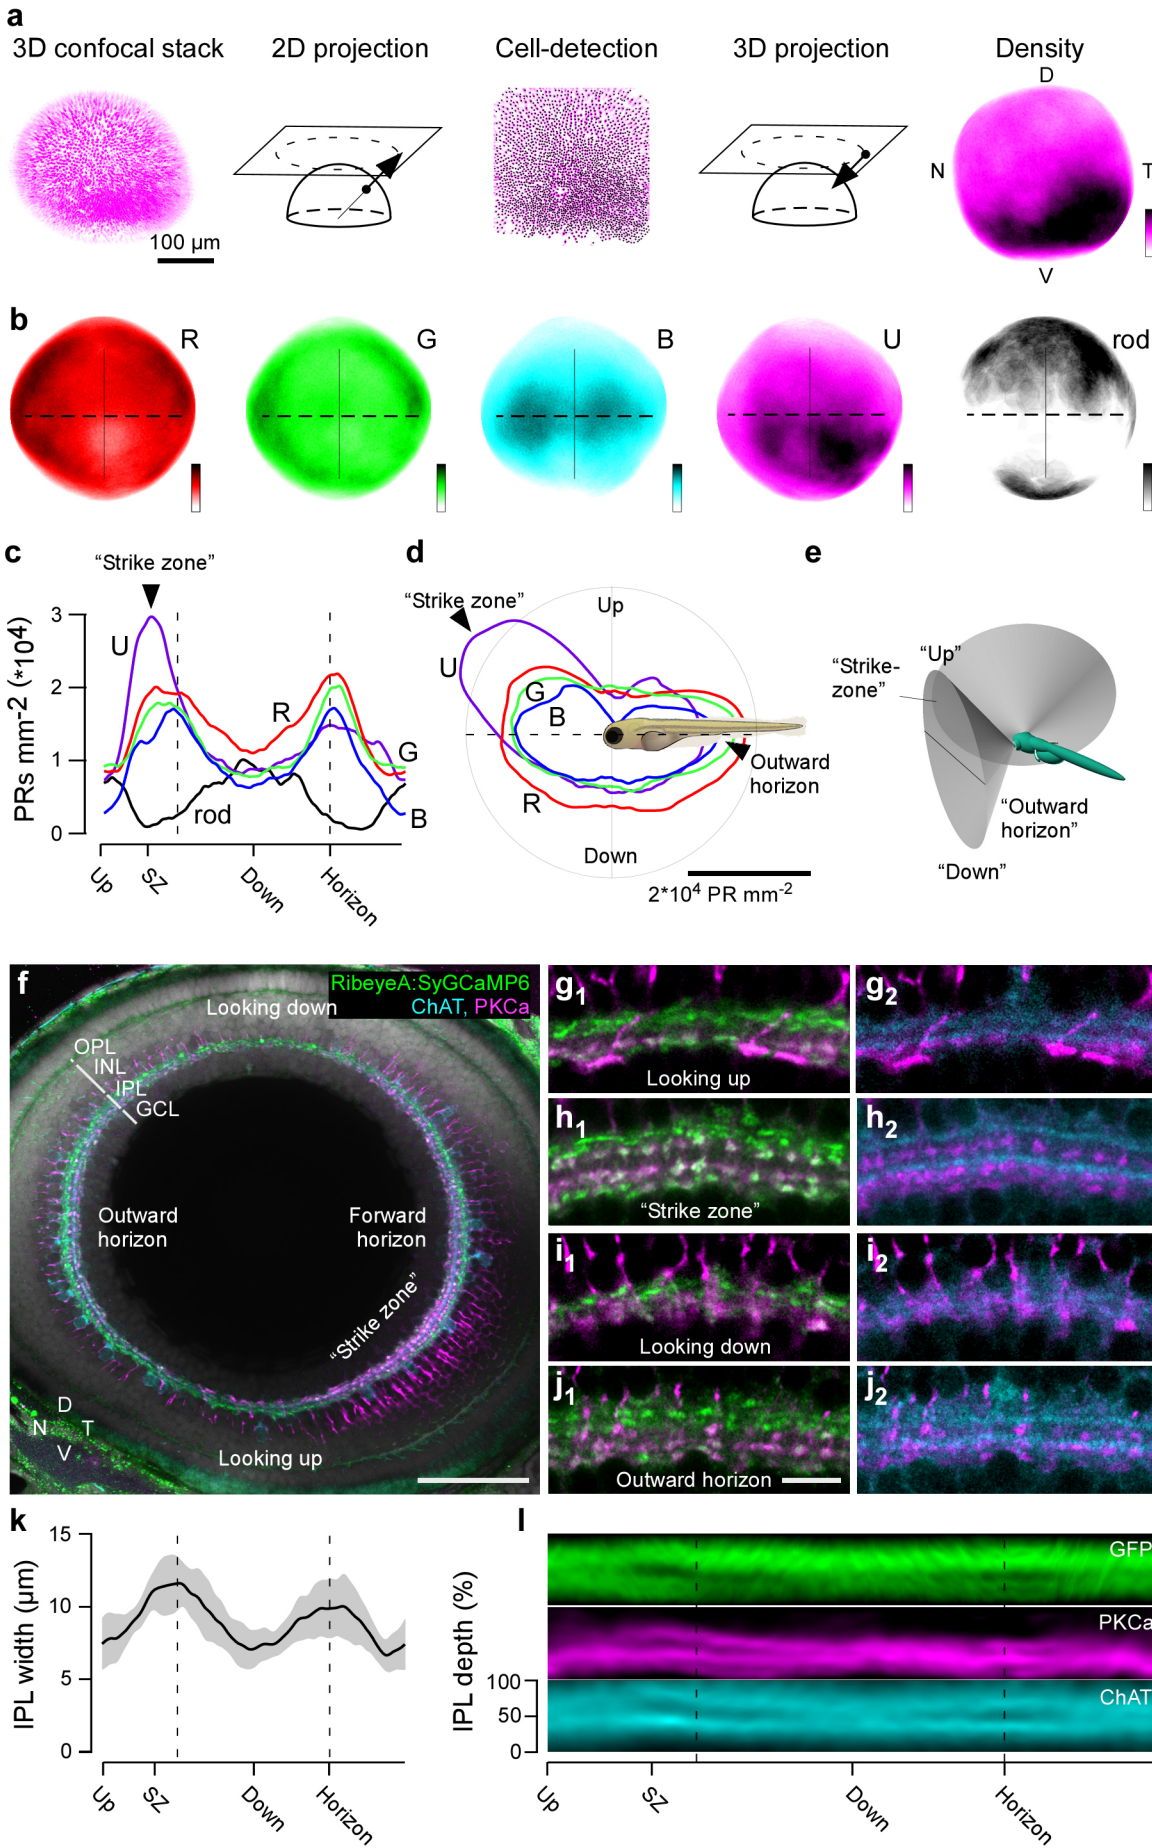

Figure 3 - Surveying inner retinal chromatic responses *in vivo*

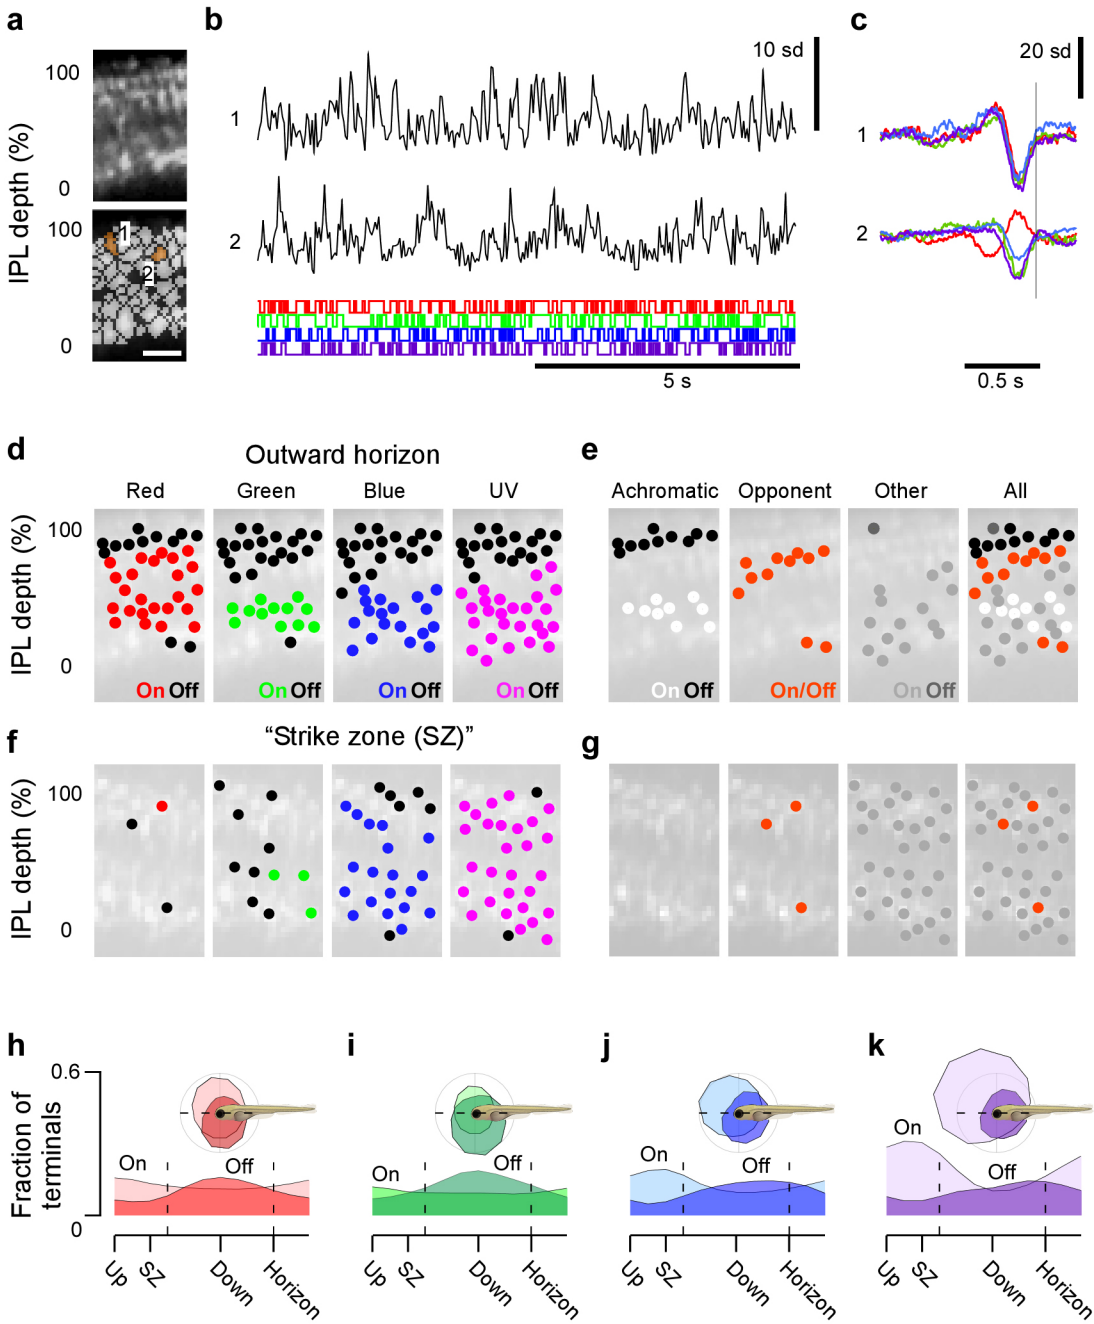

Figure 4 - The functional organisation of the larval zebrafish eye

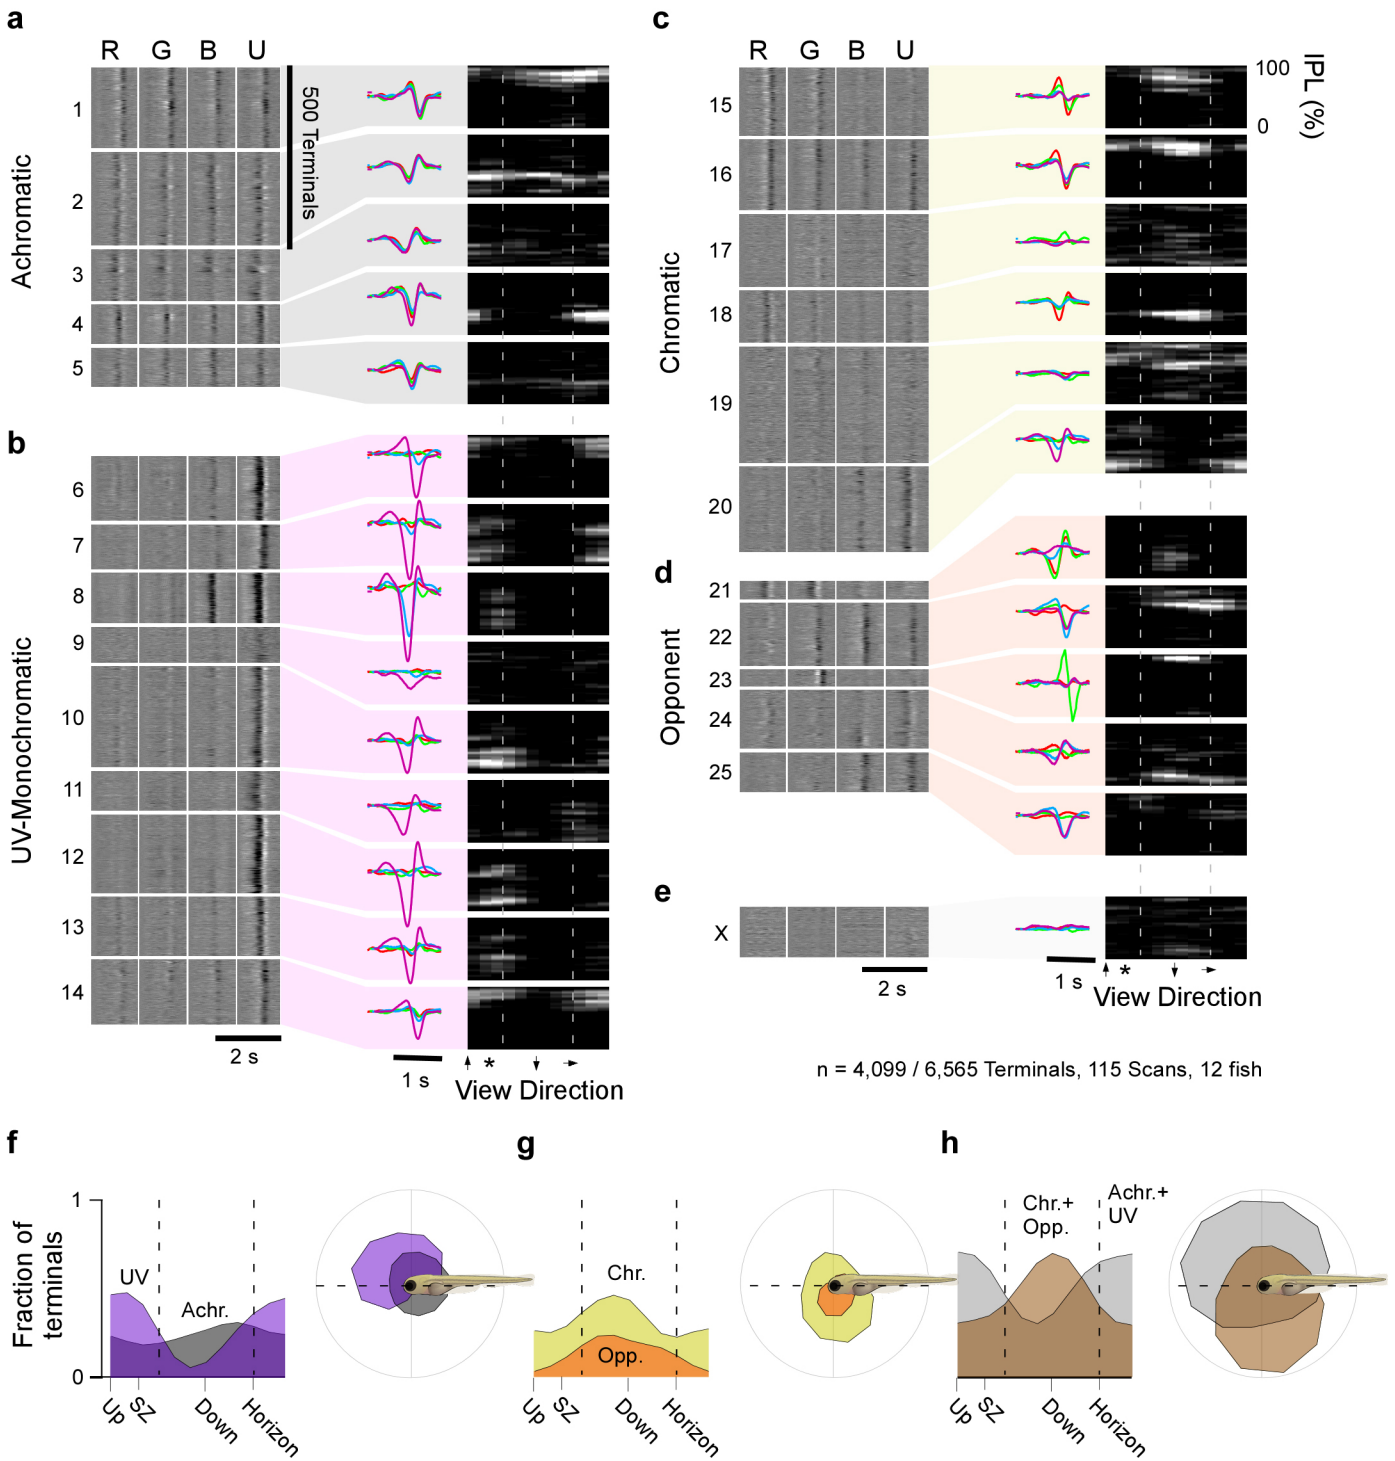



Figure 5 - Distribution of function across the IPL

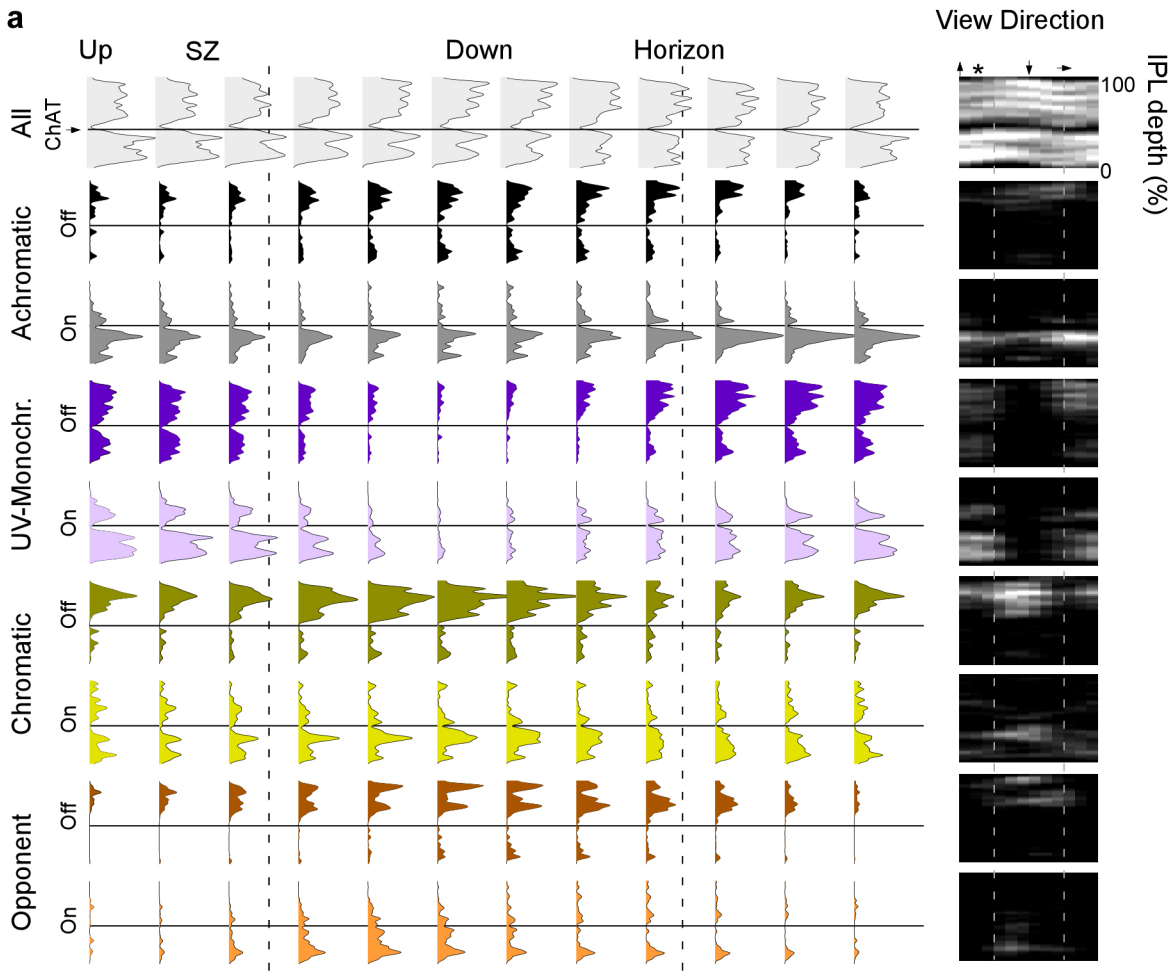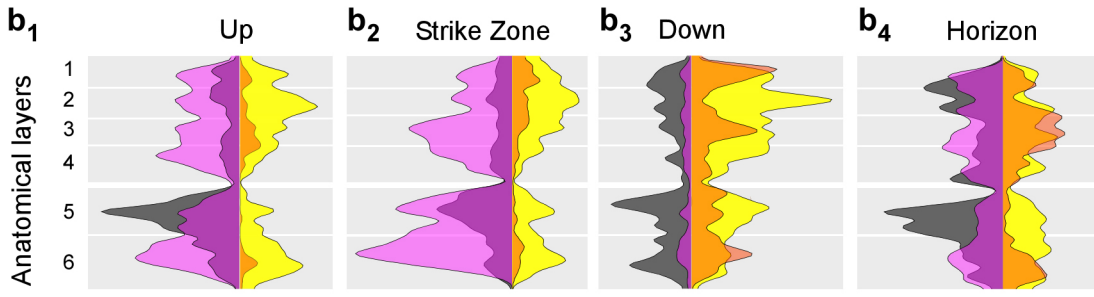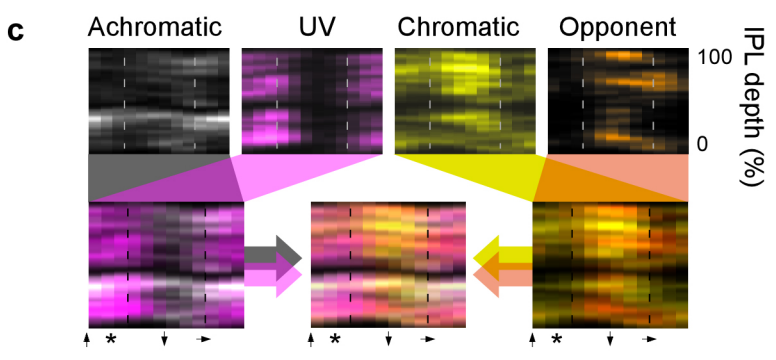

Figure 6 - Distribution of genetically defined BC-types

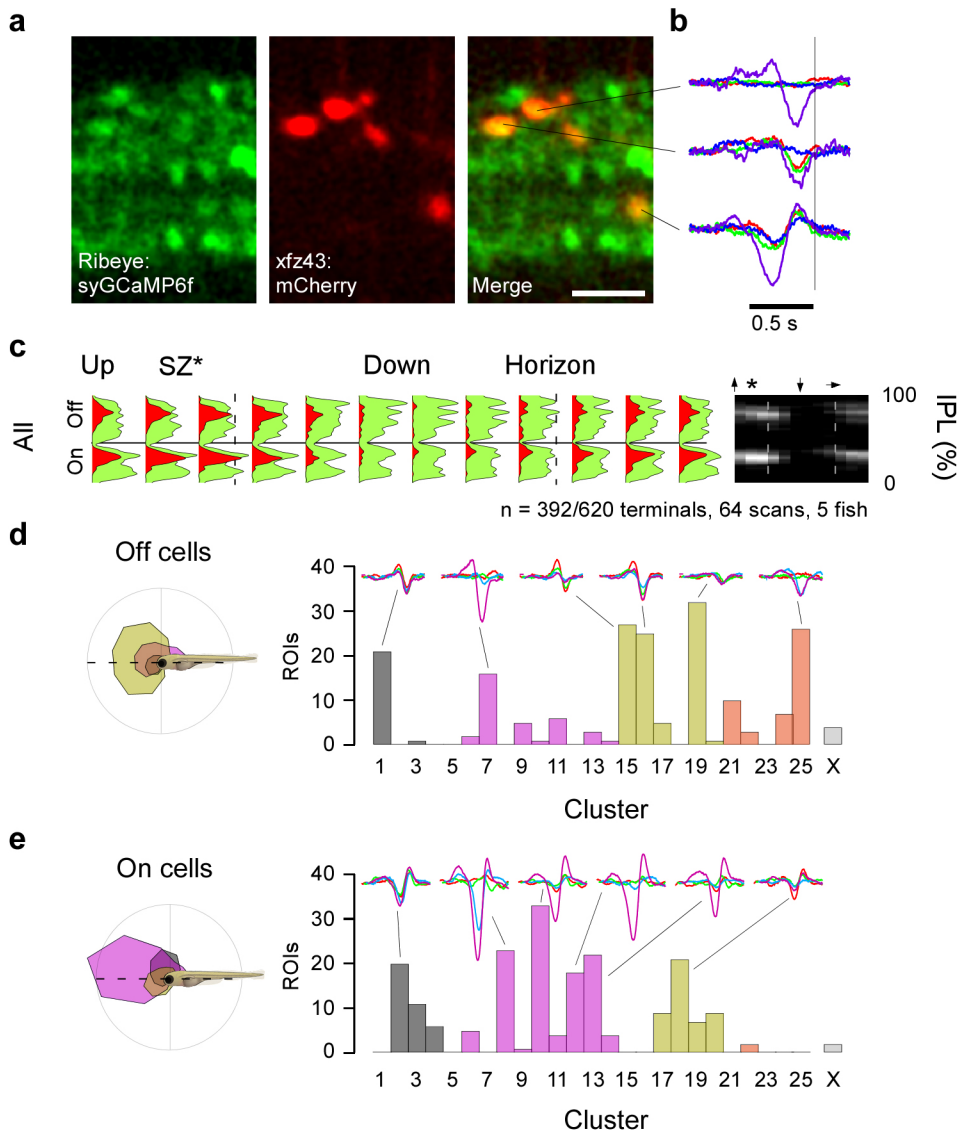

Figure 7 - Summary

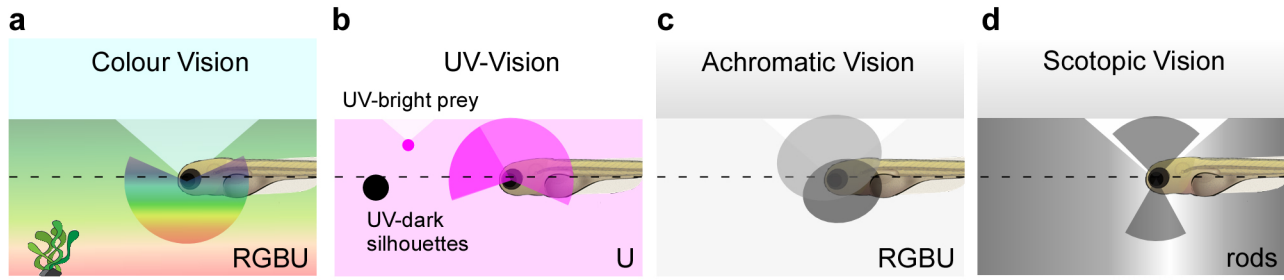

# Supplementary Figure 1

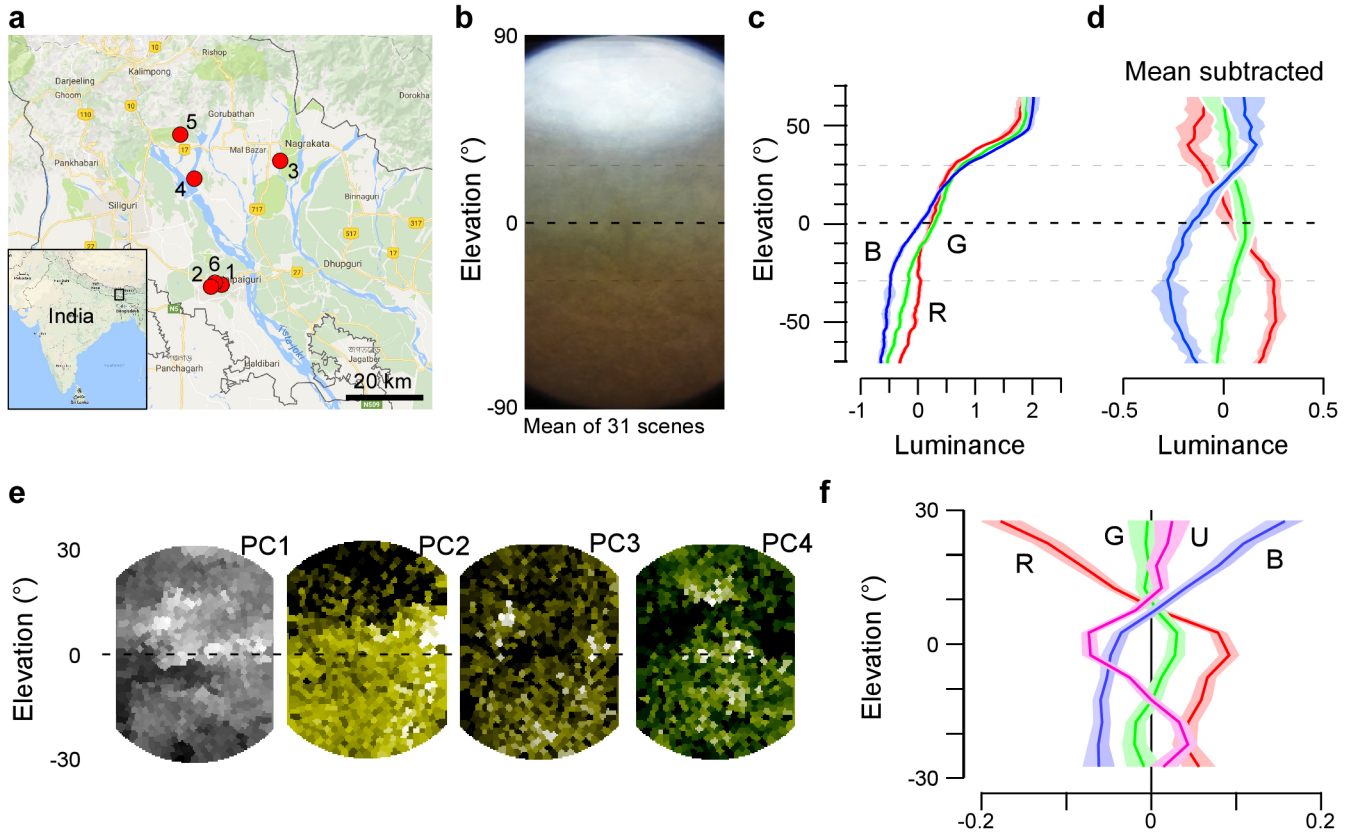

# Supplementary Figure 2

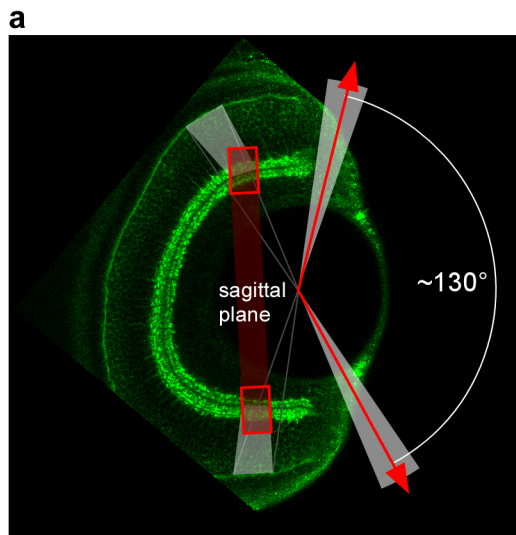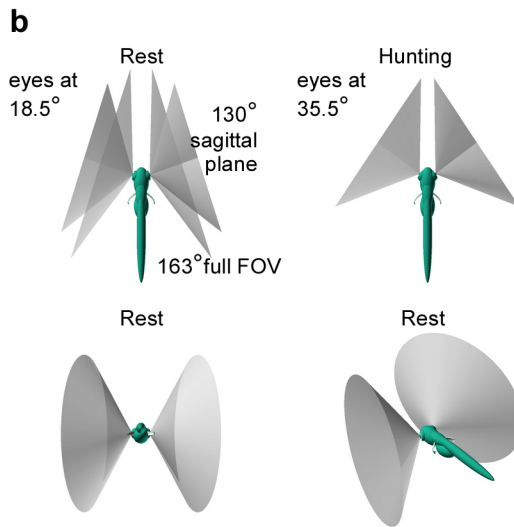

# Supplementary Figure 3

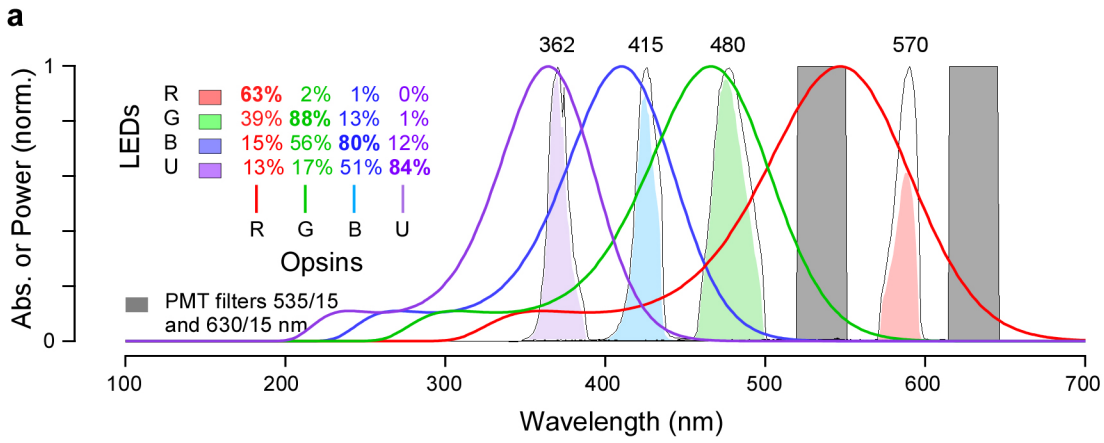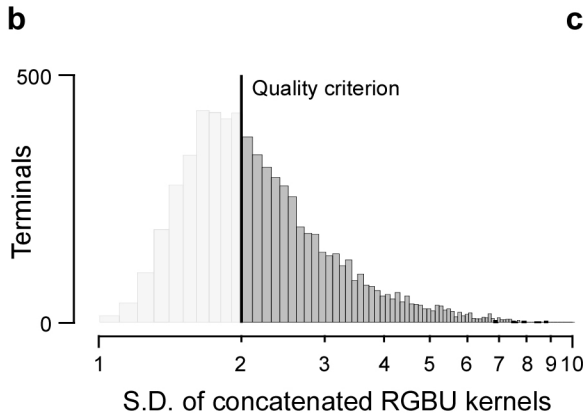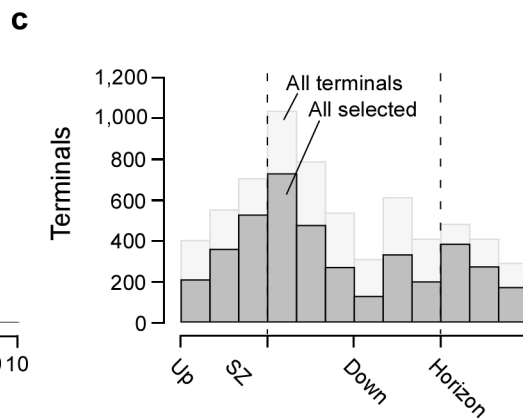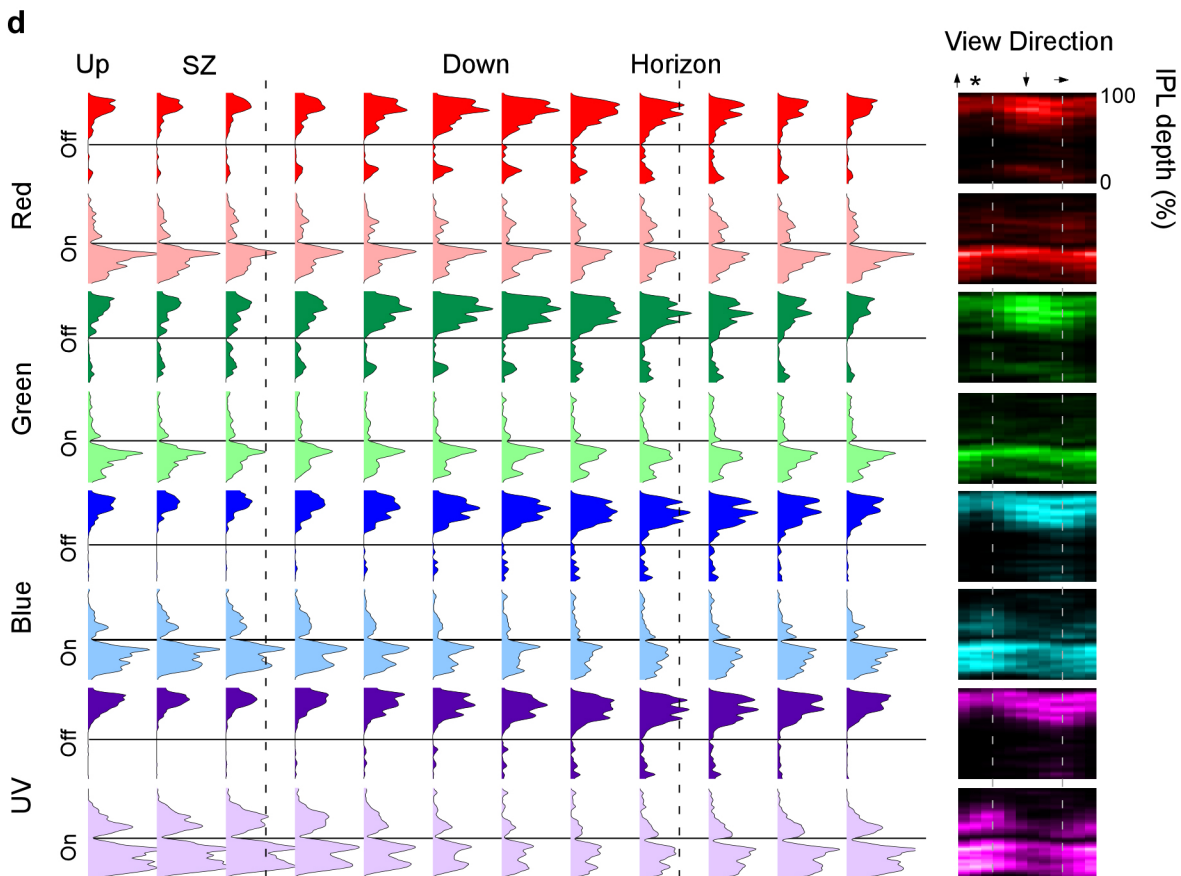

Supplementary Figure 4

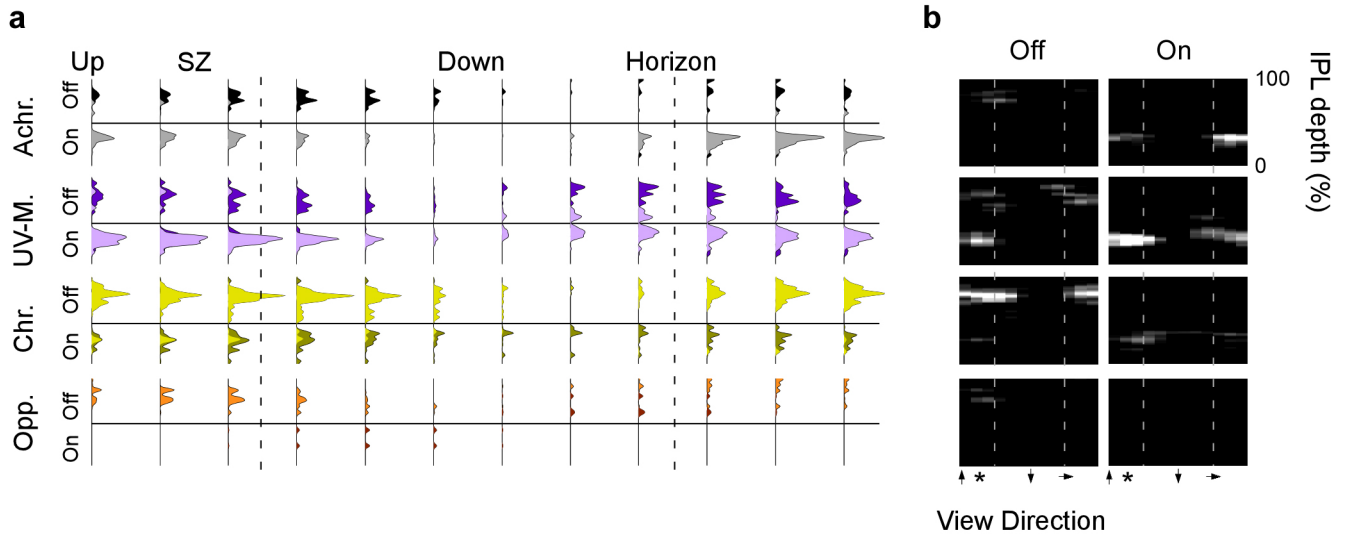



Supplementary Data Sheet 1

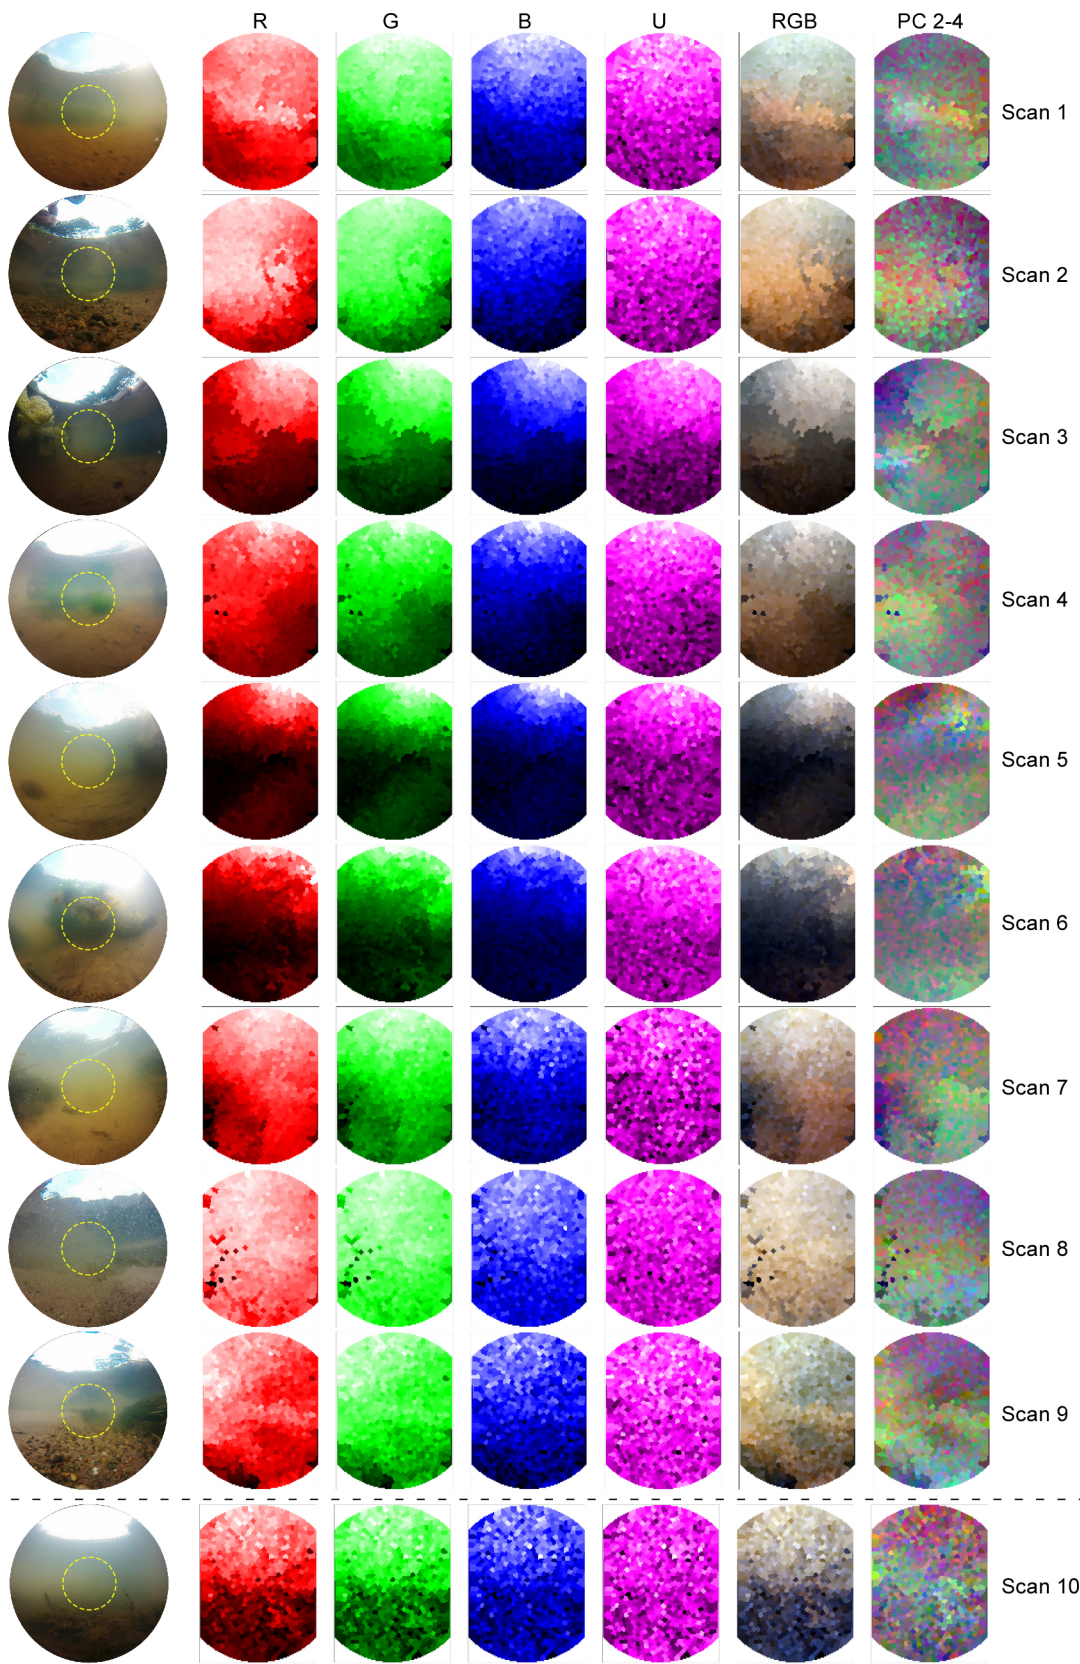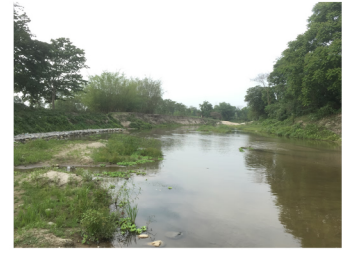

Field site 1

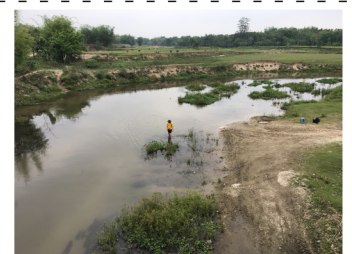

Field site 2



Supplementary Data Sheet 2

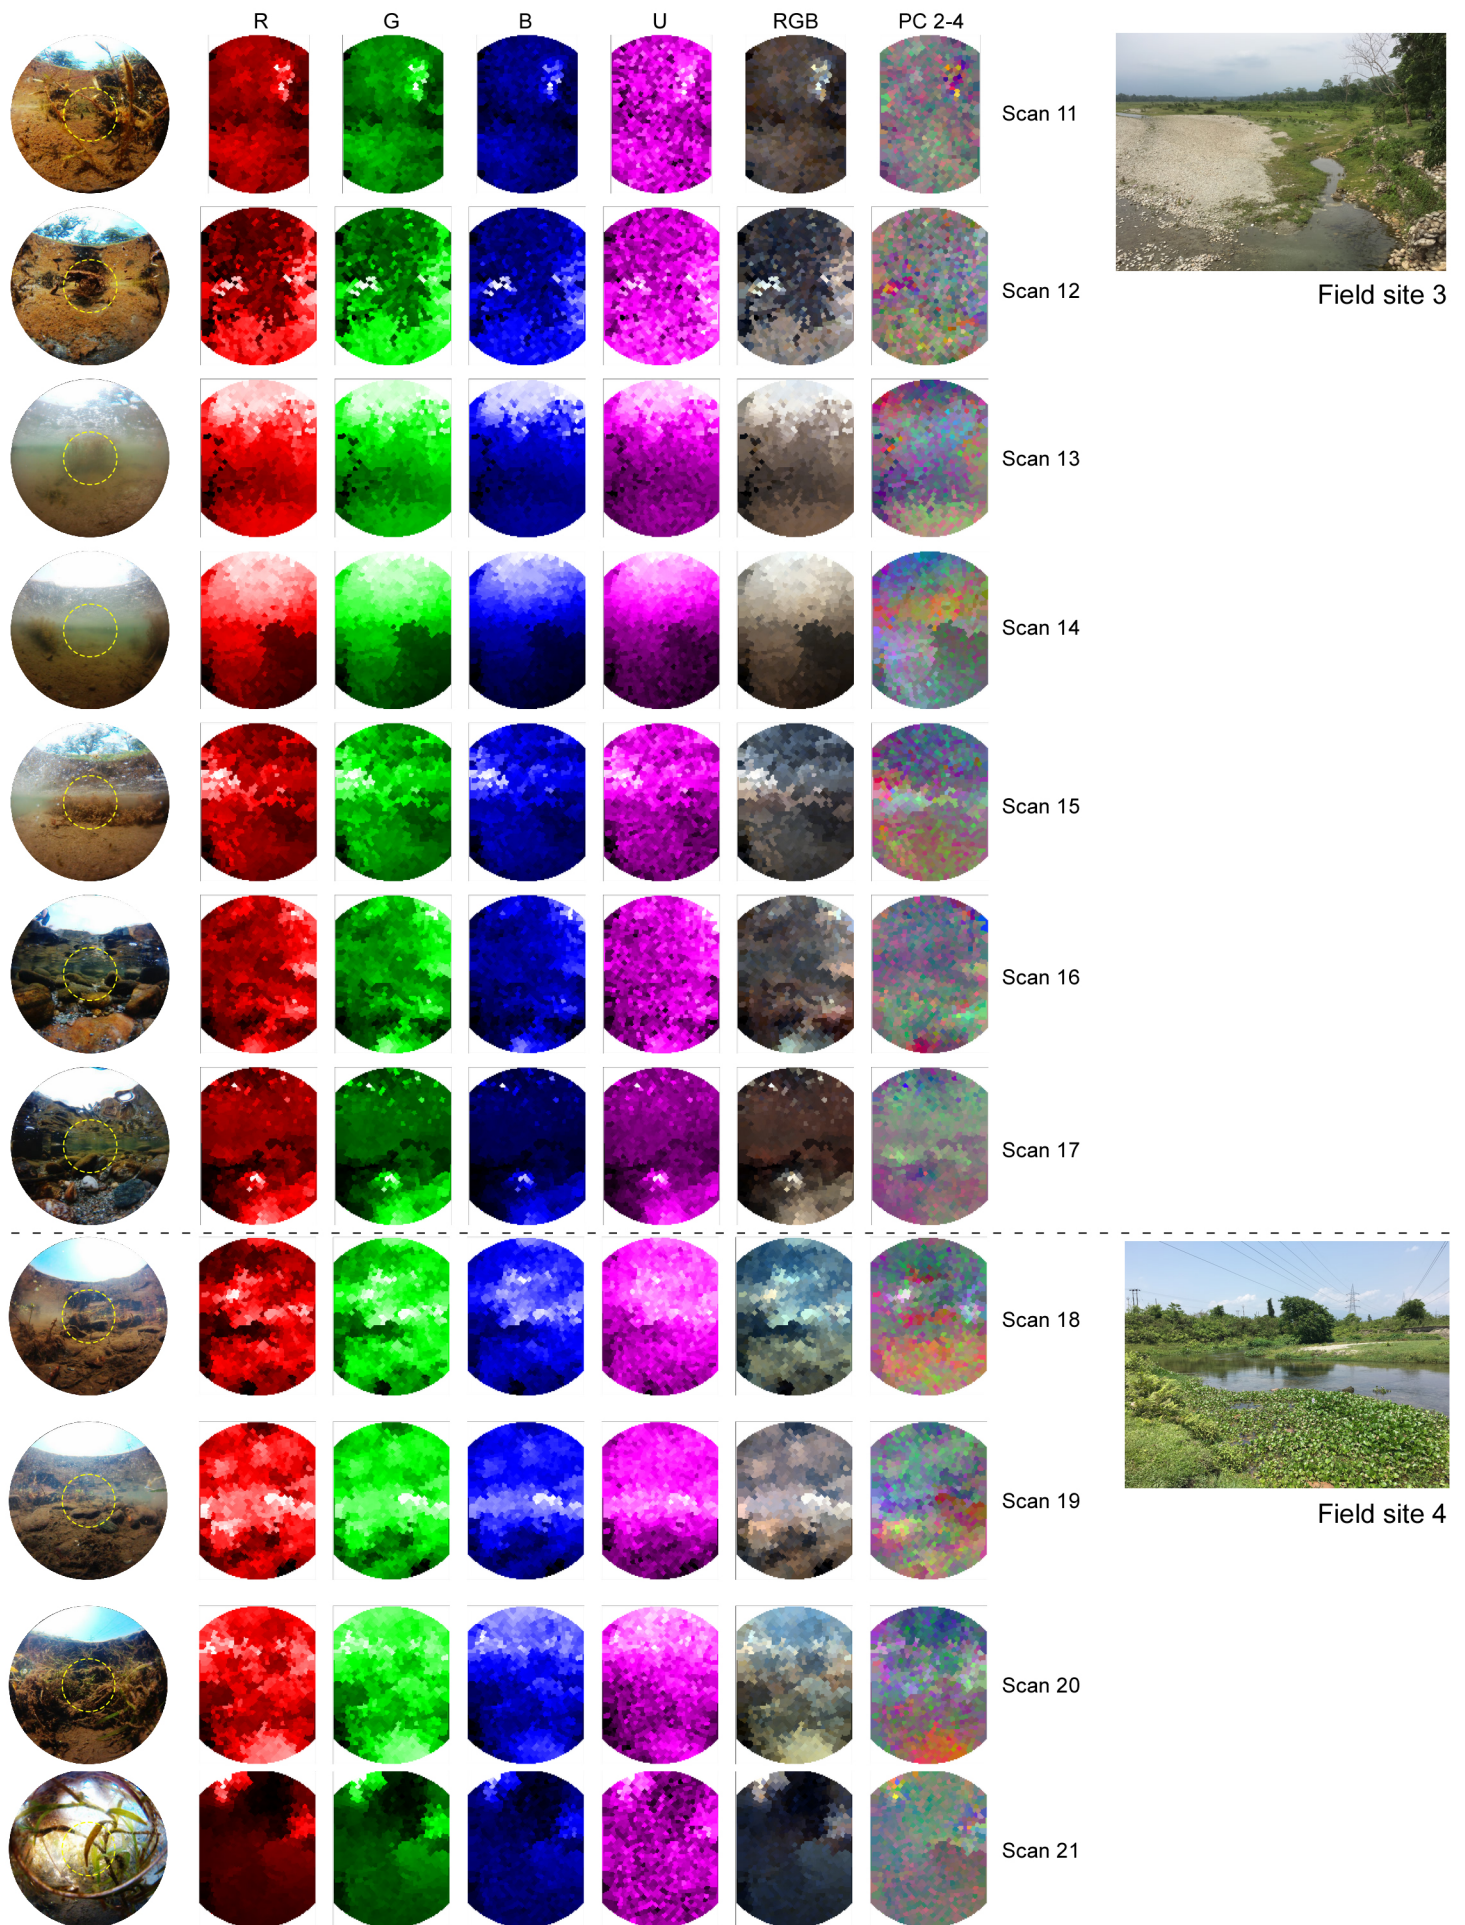



Supplementary Data Sheet 3

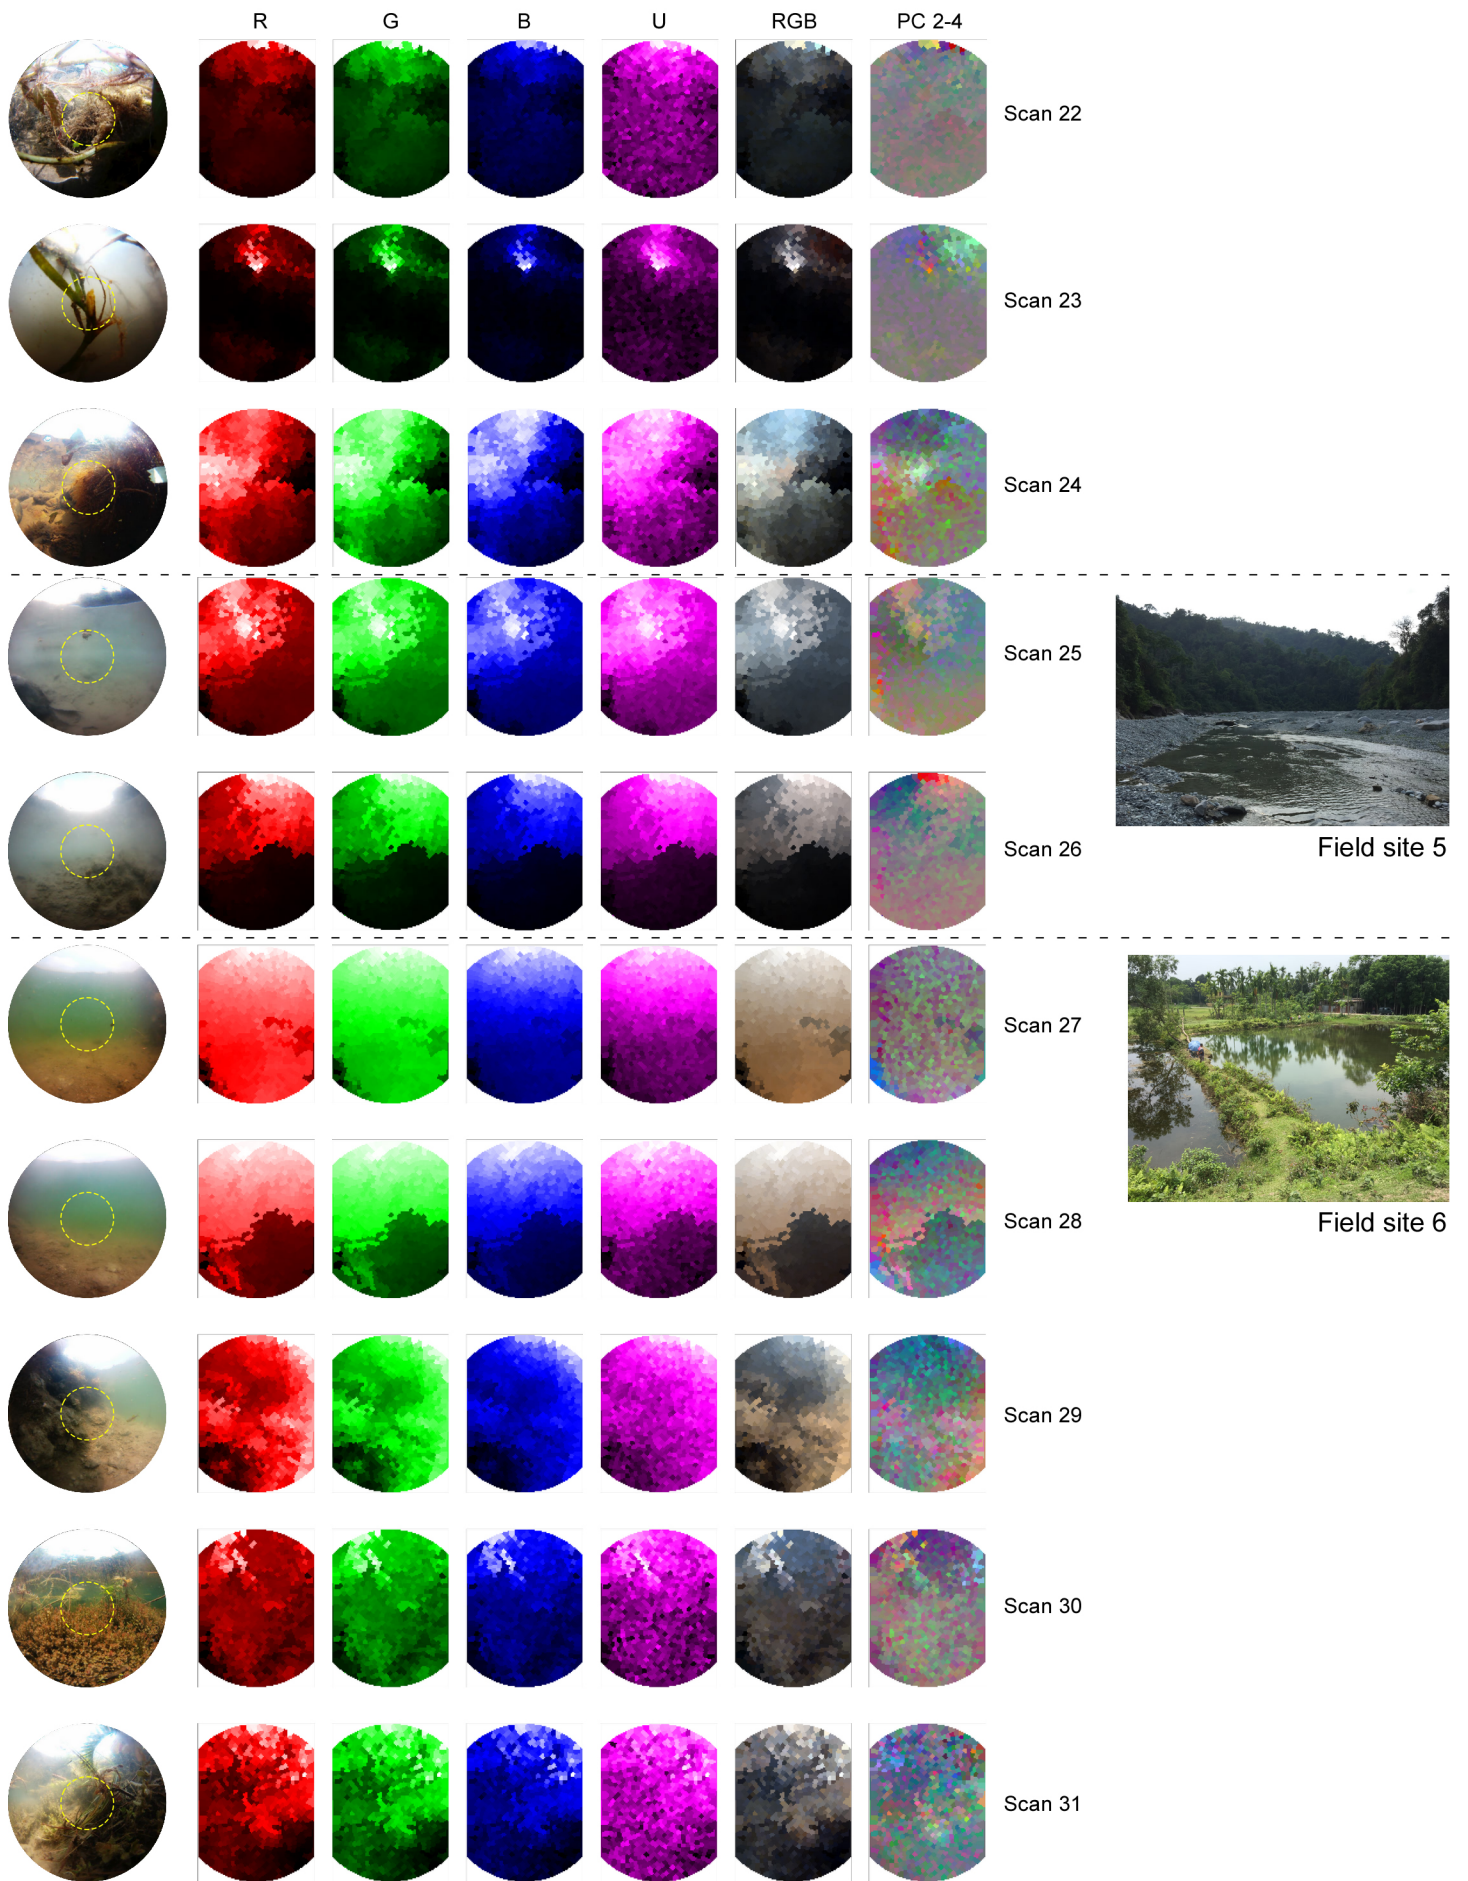

Source: https://www.biorxiv.org/content/10.1101/230144v1.full.pdf
